1 **Abstract:**

2 Assessment of single-cell gene expression (scRNA-seq) and antigen receptor sequencing  
3 (scVDJ-seq) has been invaluable in studying lymphocyte biology, but current tools are  
4 limited. Here, we introduce *Dandelion*, a computational pipeline for scVDJ-seq analysis. It  
5 enables the application of standard V(D)J analysis workflows to single-cell datasets,  
6 delivering improved V(D)J contig annotation and the identification of non-productive and  
7 partially spliced contigs. We devised a novel strategy to create an antigen receptor feature  
8 space that can be used for both differential V(D)J usage analysis and pseudotime trajectory  
9 inference. The application of *Dandelion* improved the alignment of human thymic  
10 development trajectories of double positive T cells to mature single-positive CD4/CD8 T  
11 cells, with important new predictions of factors regulating lineage commitment. *Dandelion*  
12 analysis of other cell compartments provided novel insights into the origins of human B1  
13 cells and ILC/NK cell development, illustrating the power of our approach. *Dandelion* is an  
14 open access resource (<https://www.github.com/zktuong/dandelion>) that will enable future  
15 discoveries.

## 1 Main Text:

2 Recent developments in single-cell genomics have significantly advanced our understanding  
3 of human immunology<sup>1,2</sup>. Paired antigen receptor (AgR) sequencing with mRNA expression  
4 in the same cell allows for direct linkage of AgR repertoire with cellular phenotypes, and has  
5 proven to be a powerful tool in understanding lymphocyte development and function in  
6 healthy and disease contexts<sup>3-6</sup>.

7

8 Multi-omics analysis leverages data from different modalities and has been successfully  
9 applied in recent years to study cellular biology at an unprecedented resolution. Examples  
10 include integration of paired single-cell RNA sequencing (scRNA-seq) and Assay for  
11 Transposase-Accessible Chromatin with high-throughput sequencing (ATAC-seq) data or  
12 Cellular Indexing of Transcriptomes and Epitopes by Sequencing (CITE-seq) data<sup>7,8</sup>.  
13 However, unlike many other sequencing modalities, which largely consist of continuous data,  
14 AgR repertoire sequencing data are a mixture of categorical and continuous data which pose  
15 additional challenges for integration. AgR data consist of annotations of variable (V),  
16 diversity (D) and joining (J) genes, which are selected and recombined during B/T cell  
17 development<sup>9</sup>. The Adaptive Immune Receptor Repertoire (AIRR) community was formed in  
18 2015 to help address the issues and challenges related to the curation and analysis of AgR  
19 data generated with high throughput sequencing technologies<sup>10-12</sup>. This has led to the  
20 standardization of repertoire data representation across various modes of AgR data, including  
21 single-cell V(D)J sequencing data. However, established options and packages that can deal  
22 with single-cell AgR repertoire data are largely restricted to the simple task of matching  
23 contigs to cells. Thus, there is currently a dearth of methods that can realize the full potential  
24 of paired scRNA-seq and scVDJ-seq data.

25

26 To that end, we developed *Dandelion*, a holistic analysis framework within the context of  
27 single-cell lymphocyte biology. It offers improved BCR/TCR contig annotation, integrative  
28 analysis with single cell RNA-seq data and a novel V(D)J feature space for differential V(D)J  
29 usage and pseudotime trajectory inference. Here, using two immune development datasets,  
30 we showcase how *Dandelion* can be applied to improve alignment of cells along the double  
31 positive (DP) T cell to mature T cell development trajectory, and provide novel insights into  
32 human B1 cell origin and innate lymphoid cell (ILC) and natural killer (NK) cell  
33 development.

34

## 35 Results

### 36 *Dandelion* enables holistic scVDJ-seq analysis

37 As *Dandelion* operates on the AIRR data format, it has high interoperability with existing  
38 tools in the AIRR community<sup>13,14</sup> and can serve as a bridge between these tools and single-  
39 cell gene expression analysis software ecosystem e.g. *scverse*<sup>15,16</sup> (**Fig. 1a**). *Dandelion* has  
40 also been certified by the AIRR Software Working Group to be compliant with the software  
41 standards that encourage collaboration and reproducibility.

42

1 *Dandelion* can be used to analyze single-cell BCR,  $\alpha\beta$ TCR and  $\gamma\delta$ TCR data, allowing for  
2 BCR mutation calling, improved  $\gamma\delta$ TCR mapping, extraction of both productive and non-  
3 productive V(D)J contigs and identification of unspliced J gene alignments ('multi-J  
4 mapping') (**Fig. 1b**). *Dandelion* then performs quality control checks, clonotype calling and  
5 clonotype network generation for downstream analyses. A main novel feature of *Dandelion* is  
6 the creation of a 'V(D)J feature space' that can be used to visualize TCR/BCR usage across  
7 cell pseudo-bulks or neighborhoods, perform differential V(D)J usage analysis and  
8 pseudotime trajectory inference. A summary list of features of *Dandelion* and other existing  
9 pipelines is shown in **Supplementary Fig. 1**. A subset of the functionalities of *Dandelion*  
10 was previously applied to a large COVID-19 study<sup>4</sup> which showcased its network-based  
11 repertoire diversity analysis method.

12

### 13 ***Dandelion* improves contig annotations**

14 Similar to *Change-O*<sup>14</sup>, *Dandelion* re-annotates V(D)J contigs using *igblastn*<sup>17</sup> with reference  
15 sequences contained in the international ImMunoGeneTics information system (IMGT)  
16 database<sup>18</sup>. The individual contigs are then checked with *blastn* for the D and J gene  
17 separately, using the same settings as per *igblastn*<sup>17</sup>. The additional *blastn* step allows us to: i)  
18 apply an e-value cut off for D and J calls to ensure only high confidence calls are retained; ii)  
19 identify multi-J mapping contigs (see below); and iii) recover contigs without V gene calls  
20 (removed by *igblastn*). We packaged this pre-processing workflow into a single-line  
21 command implemented via a *singularity* container to streamline and improve the user  
22 experience, circumventing the difficulty of setting up the various software environments and  
23 dependencies.

24

25 Non-productive contigs, which are contigs that cannot be translated into a functional protein,  
26 are often filtered out by other scVDJ-seq analysis pipelines e.g. *scirpy*<sup>13</sup>. Moreover, *igblastn*  
27 is a V gene annotation tool<sup>17</sup> and would filter contigs without V gene presence. We found that  
28 a significant proportion of contigs were non-productive in  $\alpha\beta$ TCR,  $\gamma\delta$ TCR and BCR data  
29 from fetal human tissues<sup>3</sup> and the majority were due to absent V genes, with the exception of  
30 the TRA locus where most non-productive contigs were annotated due to presence of  
31 premature stop codons (**Fig. 2a**). This pattern was consistent even after excluding thymic  
32 samples to remove the influence of developing T cells (**Supplementary Fig. 2a**). These non-  
33 productive contigs without V genes were captured in scVDJ-seq because the rapid  
34 amplification of 5' complementary DNA (cDNA) ends (5' RACE) technology used in the  
35 protocol does not require primers against V genes for targeted enrichment, in contrast to the  
36 previous multiplex PCR approach (**Supplementary Fig. 2b**). Although these contigs are not  
37 translated into functional proteins, they likely represent products of partial or failed  
38 recombination that we reasoned are still biologically meaningful, reflecting a cell's history  
39 and origin. Therefore, *Dandelion* does not automatically filter out non-productive contigs,  
40 and this data has utility, as later discussed, when we used it to track B1 cell origin and  
41 ILC/NK development.

42

1 We have also discovered that multiple J genes can be sequentially mapped onto different  
2 regions in the same messenger RNA (mRNA) contig, a phenomenon we termed ‘multi-J  
3 mapping’. Looking at the most frequent multi-J mapping contigs in each locus  
4 (**Supplementary Table 1**), we found that the majority were two to four neighboring J genes  
5 on the genome interspersed with introns. As the process of linking the chosen J to C genes is  
6 achieved through RNA splicing rather than DNA recombination, contigs with multi-J  
7 mapping are likely products of partially spliced transcripts (**Fig. 2c**). Nevertheless, it is  
8 biologically plausible that the J gene nearest to the 5’ end is the intended exon that would be  
9 expressed in the mature mRNA.

10  
11 We next investigated factors that might contribute to multi-J mapping. We first noted that  
12 non-productive contigs without V genes appeared to be more likely to have multi-J mapping  
13 (**Fig. 2c**). This difference could be due to nonsense-mediated decay (NMD), an RNA  
14 degradation process that is triggered when translation encounters a premature stop codon<sup>19</sup>.  
15 Multi-J mapping contigs that contain a V gene will initiate translation from the V gene, which  
16 will trigger degradation by NMD due to premature stop codons in J gene introns. Transcripts  
17 of multi-J mapping without a V gene cannot be translated and will therefore evade  
18 degradation by NMD. To test the contribution of NMD to multi-J mapping, we treated  
19 peripheral blood mononuclear cells (PBMCs) with cycloheximide to block NMD and  
20 analyzed treated and untreated cells by scRNA-seq with scVDJ-seq. This resulted in an  
21 increase in the proportion of multi-J mapping in TCR contigs with V genes (**Supplementary**  
22 **Fig. 2c**), supporting the conclusion that NMD recognises and degrades V-gene containing  
23 multi-J mapping contigs.

24  
25 We used a logistic regression model to look for additional factors associated with multi-J  
26 mapping (**Fig. 2d**) in both the Suo et al. 2022<sup>3</sup> dataset (**Supplementary Table 2**) and the new  
27 control/cycloheximide-treated PBMC dataset that we generated for this study  
28 (**Supplementary Table 3**). The above finding was further supported by a significant  
29 interaction (Benjamini–Hochberg (BH) adjusted *P*-value 0.0023) between V gene presence  
30 and cycloheximide treatment, although the significant non-interacting V gene term (BH  
31 adjusted *P*-value 1.8e-205) in the regression fit suggests that NMD may only partially  
32 account for the effect of V genes on multi-J mapping. Furthermore, we compared the  
33 sequences of 5’ end J genes positively and negatively associated with multi-J mapping and  
34 found the known consensus motif for splicing, ‘GTAAGT’ in +1 to +6 position of adjacent  
35 intron<sup>20</sup>, was disrupted in J genes associated with more multi-J mapping (**Fig. 2e**,  
36 **Supplementary Table 4**). In conclusion, the factors that might contribute to multi-J mapping  
37 include specific cell types and J gene identity, which potentially affect splicing efficiencies;  
38 as well as V gene presence, which might be partially explained by NMD (illustrated by  
39 **Supplementary Fig. 2d**).

40  
41 An additional application of *Dandelion*’s contig annotation functionality is improved  $\gamma\delta$ TCR  
42 contig recovery. The only existing method for sc- $\gamma\delta$ TCR mapping is the *cellranger vdj*  
43 pipeline developed by 10X Genomics, although this is primarily tailored for  $\alpha\beta$ TCR contigs.  
44 The software is capable of reconstructing the  $\gamma\delta$ TCR contigs, but most versions struggle with

1 annotating them, a problem 10X was aware of and addressed with user-side workaround  
2 instructions. Supplying the reconstructed contigs into *Dandelion*'s pre-processing pipeline  
3 yields re-annotated output that can be used for downstream analysis. We processed 33  $\gamma\delta$ TCR  
4 libraries<sup>3</sup>; One mapping was done with *cellranger* 6.1.2 to the 10X GRCh38 5.0.0 V(D)J  
5 reference, with the contigs identified by *cellranger* as high confidence subsequently re-  
6 annotated with *Dandelion*. Another mapping was done with *cellranger* 6.1.2 to the 5.0.0  
7 reference modified to obtain annotated  $\gamma\delta$ TCR contigs as per 10X Genomics' instructions.  
8 We see a consistent higher recovery rate of both high confidence  $\gamma\delta$ TCR contigs and high  
9 confidence productive  $\gamma\delta$ TCR contigs in the mapping post-processed with *Dandelion*,  
10 verified as statistically significant by the Wilcoxon signed-rank test ( $P$ -value for high  
11 confidence contigs:  $5.39e-7$ ,  $P$ -value for high confidence productive contigs:  $3.14e-6$ ) and  
12 showing a large effect size (rank correlations equal to 1 and 0.98 for all high confidence  
13 contigs and high confidence productive contigs respectively) (**Fig. 2f**). While 10X Genomics  
14 has introduced some  $\gamma\delta$ TCR support with *cellranger* 7.0.0, the results were inferior to the  
15 prior workaround from version 6 (**Supplementary Fig. 2d**).  
16

## 17 **Creating a V(D)J feature space**

18 To better leverage the combined gene expression and AgR repertoire data, we introduced a  
19 novel analysis strategy to create a pseudo-bulk V(D)J feature space, which transforms select  
20 V(D)J data from categorical to continuous format for downstream applications (**Fig. 3a**).  
21 Cells are first grouped into pseudo-bulks, which can be based on metadata features such as  
22 donors, or partially overlapping cell neighborhoods<sup>21</sup>. V(D)J usage frequency per pseudo-  
23 bulk is then computed, serving as the V(D)J feature space. This can then be used with  
24 conventional dimension reduction techniques such as principal component analysis (PCA) or  
25 uniform manifold approximation and projection (UMAP).  
26

27 The utility of this V(D)J feature space is demonstrated on a dataset containing adult human T  
28 cells<sup>5</sup> (**Fig. 3b**). We pseudo-bulked cells by cell types and donors to explore differential usage  
29 that is consistent across different donors. On the new UMAP computed from the V(D)J  
30 feature space, pseudo-bulks containing mucosal-associated invariant T (MAIT) cells formed  
31 a distinct cluster away from the others, in contrast to the single-cell gene expression space  
32 UMAP, indicating its unique V(D)J usage (**Fig. 3b, Supplementary Fig. 3a-b**). Although  
33 there is no clear clustering in other cell types apart from MAIT (**Supplementary Fig. 3b**),  
34 there is a distinct separation between cell types that belong to CD4<sup>+</sup>T cells with those of  
35 CD8<sup>+</sup>T cells (**Fig. 3b**). The differential V(D)J usage for each cell type can be computed  
36 similarly to differentially expressed gene calculation e.g. with non-parametric statistical tests  
37 implemented within *scanpy*<sup>15</sup> (**Fig. 3b, Supplementary Table 5**).  
38

## 39 **Leveraging V(D)J usage in pseudotime trajectory inference**

40 We also developed a novel usage for V(D)J data by performing pseudotime inference in  
41 lymphocytes with the cell neighborhood-based V(D)J feature space. Many pseudotime  
42 inference methods have been proposed to infer cell development based on transcriptomic  
43 similarity<sup>22</sup>. However, the current approaches remain problematic in immune cell

1 development because the differentiation process is often interspersed with waves of  
2 proliferation, and transcriptomic convergence e.g. between NKT cells and NK cells can be  
3 misleading. Because usage of V(D)J genes in AgRs changes definitively as a result of cycles  
4 of recombination and selection during lymphocyte development, the AgR repertoire acts as a  
5 natural ‘time-keeper’ for developing T and B cells. A developing T cell’s fate towards CD8  
6 *versus* CD4 T cells is determined by whether its TCR interacts with antigen presented on  
7 MHC class I or class II during positive selection. Therefore, it is biologically conceivable that  
8 the TCR gives more accurate predictions on the branch probability to each T cell lineage.  
9 This is the motivation for leveraging V(D)J data in pseudotime inference. For this task, we  
10 chose to pseudo-bulk by cell neighborhoods as modeling cell states with partially overlapping  
11 cell neighborhoods has advantages over clustering into discrete groups; clusters do not  
12 always provide the appropriate resolution and might miss important transition states.

13

14 We sampled cell neighborhoods on a k-nearest neighbor (KNN) graph built with gene  
15 expression data using *Milo*<sup>21</sup>. An example is shown in **Supplementary Fig. 3c** and **Fig. 3c**  
16 using the dataset from Suo et al. 2022<sup>3</sup> showing cells with paired productive  $\alpha\beta$ TCR from  
17 double positive (DP) T cells to mature CD4+T and CD8+T. This neighborhood V(D)J feature  
18 space was the input to compute pseudotime with *palantir*<sup>23</sup>. It outputs pseudotime and branch  
19 probabilities (**Fig. 3c**) to each terminal state with a predefined starting point and terminal  
20 states (**Supplementary Fig. 3d**). The inferred pseudotime follows from proliferating DP  
21 (DP(P)) to quiescent DP (DP(Q)) T cells, to abT(entry) which splits into CD8+T and CD4+T  
22 lineages. Trends of TCR usage can also be visualized along the pseudotime trajectory  
23 (**Supplementary Fig. 3e**). Pseudotime and branch probabilities can then be projected back  
24 from neighborhoods to cells (**Fig. 4a**) by averaging the parameters from all neighborhoods a  
25 given cell belongs to, weighted by the inverse of the neighborhood size.

26

27 With the same dataset, we tested an alternative method provided by CoNGA<sup>24</sup> whereby  
28 dimension reduction was performed on TCR sequence-based distance metrics. However, the  
29 relationships between cell types were not preserved (**Supplementary Fig. 3f**). This is not  
30 surprising, as what is changing during recombination is selection of different V(D)J genes,  
31 while CDR3 junctional sequence diversity can additionally be influenced by random  
32 nucleotide insertions. This likely explains why the sequence-based distance metrics used in  
33 e.g. CoNGA do not capture the intercellular relationships as faithfully as the V(D)J feature  
34 space.

35

### 36 **V(D)J trajectory accurately orders DP T cells and reveals early CD4/CD8** 37 **lineage decision genes**

38 We next compared the pseudotime and branch probabilities inferred from the neighborhood  
39 V(D)J feature space with the same parameters inferred from either single-cell gene  
40 expression or neighborhood gene expression feature space.

41

42 Pseudotime inferred directly from single-cell gene expression performed unsatisfactorily, as a  
43 large proportion of CD8+T and CD4+T cells were misclassified with higher branch

1 probabilities to the opposite terminal state (**Supplementary Fig. 4a-b**). We mainly focused  
2 our comparison with results from pseudo-bulked neighborhood gene expression (GEX)  
3 space, which produced more biologically meaningful pseudotime and branch probabilities  
4 (**Fig. 4a**). To construct the pseudo-bulked neighborhood GEX space, raw gene counts were  
5 pseudo-bulked by the same neighborhoods used to construct the V(D)J feature space  
6 (**Supplementary Fig. 3c**), and then normalized and logarithmically transformed. Pseudotime  
7 and branch probabilities were computed on this neighborhood GEX feature space and  
8 projected back to cells (**Supplementary Fig. 4c and 4d**). The inferred pseudotime in the  
9 pseudo-bulked space better reflected the known biology of DP(P)\_T to DP(Q)\_T, to  
10 abT(entry) and subsequent splits into CD8+T and CD4+T lineages. This suggests that  
11 pseudotime inference with pseudo-bulked cells work better than directly from single cells,  
12 potentially due to more stable transcriptomic profiles compared to more noisy single-cell  
13 data.

14  
15 We observed two major differences when comparing the pseudotime inferred from  
16 neighborhood V(D)J feature space *versus* that from neighborhood GEX space (**Fig. 4a**). First,  
17 DP(Q) T cells appeared to dwell for a longer ‘time’ in the V(D)J trajectory as compared to  
18 the GEX trajectory. Second, the branching point of CD8+T and CD4+T cell lineages  
19 happened earlier in abT(entry) cells in the V(D)J trajectory (**Supplementary Fig. 5c**). In  
20 order to assess the fidelity of the V(D)J trajectory, we used the known fact that V-J  
21 recombination in the TRA locus happens processively<sup>25</sup> using genes in the middle of the  
22 genomic locus and progressing to the two distal ends in an orderly manner. We have  
23 therefore encoded the genomic order numerically for each TRAV and TRAJ gene, and looked  
24 at the average TRAV and TRAJ relative locations for each DP(Q) neighborhood against their  
25 pseudotime ordering (**Fig. 4b**). V(D)J pseudotime showed a substantially better monotonic  
26 relationship with TRAV relative locations. Local Pearson’s correlations were computed over  
27 sliding windows of 30 adjacent neighborhoods on the pseudotime order (**Supplementary**  
28 **Fig. 5a**), and V(D)J pseudotime had higher absolute correlation coefficients on average (-  
29 0.65 *versus* -0.40 for TRAV). A smaller improvement was also observed for TRAJ, with the  
30 average local Pearson’s correlations improved from 0.38 to 0.40 (**Supplementary Fig. 5b**).

31  
32 CD4 *versus* CD8 T cell lineage commitment is a classical immunological binary lineage  
33 decision that has been intensely investigated over many years<sup>26</sup> but remains challenging to  
34 study as the selection intermediates have been difficult to observe directly<sup>27</sup>. We examined  
35 which genes in abT(entry) cells showed expression patterns that are correlated with branch  
36 probabilities to CD8+T lineage (**Fig. 4c**). This approach actually allows us to subdivide the  
37 abT(entry) cell population into two subsets, associated with higher probability of CD4 *versus*  
38 CD8 differentiation respectively.

39  
40 When considering the top genes that were positively correlated with the CD8+ T cell lineage  
41 choice, these included *CD8A* and *CD8B*, which are markers for CD8+T cells<sup>6</sup>. The top genes  
42 that were negatively correlated included *CD40LG*, which is a marker for CD4+T helper  
43 cells<sup>6</sup>, and *ITM2A* which is found to be induced during positive selection and causes CD8  
44 downregulation<sup>28</sup>. Other markers of CD4+T cells such as *CD4*<sup>6</sup>, together with highly



1 validated transcription factors (TFs) that are known to be involved in CD8+T or CD4+T  
2 lineage decisions<sup>26</sup>, including *RUNX3*<sup>29,30</sup>, *ZBTB7B*<sup>31,32</sup>, *TOX*<sup>33</sup> and *GATA3*<sup>34,35</sup> all displayed  
3 significant correlations in the expected directions. In contrast, when we performed the same  
4 test with CD8+T branch probabilities from GEX pseudotime, the magnitude of the  
5 correlation coefficients were notably reduced and some (e.g. *ITM2A* and *RUNX3*) were no  
6 longer statistically significant (**Fig. 4c**). In the case of *TOX*, the direction of the correlation  
7 was wrongly inverted (**Fig. 4c**). In addition, the V(D)J pseudotime also revealed novel  
8 associations between the trajectories and TFs such as *ZNF496*, *MBNL2*, *RORC* and *FOXP1*  
9 for CD8+T, and *SATB1*, *STAT5A* and *STAT1* for CD4+T (**Supplementary Fig. 5d**, full gene  
10 list in **Supplementary Table 6**). These new insights into TFs predicted to be involved in  
11 lineage commitment merit future investigations and validations.

12  
13 Taken together, we showed that V(D)J-based pseudotime inference gives more accurate  
14 DP(Q) T cell alignment, improves association of CD8/CD4 branch probabilities within  
15 abT(entry) cells allowing us to subdivide this cell state. We can use this approach to  
16 recapitulate known regulators, and uncover novel candidate regulators underlying  
17 CD8+T/CD4+T fate choice.

18

## 19 **New insights into lymphocyte development using non-productive** 20 **recombination as a “fossil record”**

21 Based on our earlier observations of high proportions of non-productive contigs being  
22 represented in the single-cell V(D)J data (**Fig. 2a**), we next explored whether different  
23 lymphoid cell types expressed different proportions of non-productive contigs. While non-  
24 productive BCR contigs were restricted to B lineage cells (**Supplementary Fig. 6a-b**) as  
25 expected, we were surprised to find that non-productive TRB contigs were not only expressed  
26 in developing DN T cells, but also in the ILC/NK lineage, and some B lineage cells (**Fig. 5a**,  
27 **Supplementary Fig. 6c**). The majority of the non-productive TRB contigs within ILC/NK/B  
28 cells were contigs without V gene (**Supplementary Fig. 6d**).

29

30 The B lineage cells with non-productive TRB contigs included pre-pro B and B1 cells but not  
31 pro- or pre-B cells (**Fig. 5a**, **Supplementary Fig. 6c**). Pre-pro B and B1 cells expressed only  
32 non-productive TRB but not TRG/D contigs (**Supplementary Fig. 7a-c**), suggesting that pre-  
33 pro B and B1 cells share a common development route (**Fig. 5b** schematic illustration). This  
34 clarifies that B1 cells in human fetal development stages emerge through an alternative route  
35 to the rest of mature B cells (B2 cells). This is a different paradigm for B1 development as  
36 compared to the murine data suggesting B1 differentiation from B2 cells<sup>36</sup>.

37

38 The ILC/NK lineage also expressed non-productive TRG/D contigs with some TRA contigs  
39 (**Supplementary Fig. 7a-c**), similar to DN T cells. With the V(D)J feature space described  
40 above (**Fig. 3**), we used TRBJ frequency as the input to delineate T/ILC/NK developmental  
41 trajectories, since all of them express TRBJ (**Fig. 5b**, **Supplementary Fig. 8a**). The inferred  
42 trajectory suggests that ILC/NK cells deviate away from T cell development between  
43 DN(early) and DN(Q) stage (**Fig. 5b-c**).

1  
2 Previous literature on the ILC/NK lineage has also demonstrated partial recombination of  
3 TRG/D in murine lung ILC2<sup>37</sup>, and of TRB/G in murine thymic ILC2<sup>38</sup>, leading to the  
4 hypothesis of ‘aborted’ DNs for ILC/NK development<sup>39</sup>. Our observation of the expression of  
5 non-productive TRB/G/D in ILC/NK cells partially supports this theory. Notably, we also  
6 observed non-productive TRB expression in ILC/NK cells in other fetal organs, with no overt  
7 differences in frequencies between organs (**Supplementary Fig. 7d**). This potentially  
8 suggests that T cells and ILC/NK cells might share the same initial stage of development, and  
9 then deviate away from each other before productive TRB/G/D is made.

10  
11 In addition, by examining the expression patterns of transcription factors (**Fig. 5c**) and genes  
12 encoding cell surface proteins (**Supplementary Fig. 8b**) that changed along the TRBJ-  
13 inferred pseudotime, we can define stages for DN development at higher resolution than  
14 previously reported in the literature. We observed that expression levels of genes such as  
15 *SPI1*, *RAG1*, *HHEX*, *TCF12*, *CD34*, *CD3D*, *CD3E*, *CD8A*, *CD8B*, *CD4* followed an expected  
16 pattern along the trajectory<sup>40</sup>. At the same time, we also discovered many novel genes that  
17 could re-define DN stages. We further noted that there were some discordances in expression  
18 patterns of selected transcription factors between human and mouse DN development<sup>40</sup>  
19 (**Supplementary Fig. 8c**).

20  
21 In summary, the unexpected finding of expression of non-productive TCR contigs in specific  
22 cell types sheds new light on the origin and history of lymphocyte development. We have  
23 utilized this information and suggested that B1 potentially arises directly from pre-pro B  
24 cells, and provided support for the ‘aborted’ DN theory for the origin of ILC/NK cells.

## 25 26 **Discussion**

27 Overall, *Dandelion* improves upon existing methods with more refined contig annotations,  
28 recognising non-productive contigs, identifying multi-J mapping and recovering more  $\gamma\delta$ TCR  
29 contigs. In conjunction with our novel V(D)J feature space approach with pseudotime  
30 trajectory inference, it has allowed us to better align CD4 *versus* CD8 T cell lineage  
31 commitment processes, and further identify developmental origins of innate-like lymphocyte  
32 cells.

33  
34 Our improved data processing workflow revealed two unexpected data challenges and  
35 opportunities with scVDJ-seq. First, the surprising observation that a high proportion of  
36 TCR/BCR contigs are non-productive suggests that these are unique data challenges in the  
37 single-cell space due to choice of library construction. However, it is not unexpected as  
38 V(D)J rearrangement is a ‘wasteful’ exercise, a price that comes with the generation of  
39 effective and diverse immune response; for example, two out of three rearrangement events  
40 for immunoglobulins are destined to be non-productive<sup>41,42</sup>. While non-productive TCRs and  
41 BCRs from high-throughput ‘bulk’ AgR sequencing data have previously been used in  
42 conjunction with productive contigs to estimate the generation probabilities and diversities of  
43 AgRs during affinity maturation and infection<sup>43,44</sup>, these would only have factored in those

1 with V gene annotation due to library construction limitations. Through scVDJ-seq and  
2 analysis using *Dandelion*, we now have the ability to corroborate this at the single-cell level,  
3 including partially rearranged contigs, as outlined in our analysis of innate lymphocyte  
4 development. This suggests that the presence of the non-productive contigs may have  
5 important biological implications in a cell-type specific manner.

6  
7 Second, detection of multi-J mapping suggests that these are naturally occurring and likely  
8 represent products of partial splicing events at the transcript level. A few factors were  
9 identified to be associated with multi-J mapping, including J gene identities, which  
10 potentially affect splicing efficiencies with their disrupted splicing site, as well as V gene  
11 presence, which might be partially explained by NMD<sup>19</sup>. The biological implications of the  
12 presence of these multi-J mapping contigs are unclear at this stage and require future  
13 experimental validation to understand how and why they arise.

14  
15 We introduced a novel way of analyzing the single-cell V(D)J modality in *Dandelion* with  
16 the pseudo-bulk V(D)J feature space, which can be used for visualization and differential  
17 V(D)J usage testing. In addition, when the pseudo-bulking is done by gene expression  
18 neighborhoods, the V(D)J feature space is anchored to the underlying gene expression feature  
19 space where cell neighborhoods are sampled. We utilized this approach for pseudotime  
20 trajectory inference and demonstrated its advantages in both of our case studies.

21  
22 The first case study examined the processes underlying T cell development in the thymus.  
23 Our approach allowed us to discover that fate commitment starts earlier than expected with  
24 the inclusion of TCR information. It was previously suggested that abT(entry) cells were  
25 likely to be a point of divergence due to its position as an intermediary cell state between DP  
26 T cells and mature single positive T cells<sup>6</sup>. With this new technique that includes TCR  
27 information, we are now able to better delineate the branching point to a much earlier point  
28 within the abT(entry) cells. The gene expression patterns of marker genes and transcription  
29 factors known to be associated with CD4 *versus* CD8 T cell fate were better aligned with the  
30 new trajectories. Our analysis has further revealed novel CD4/8 associations with other  
31 transcription factors that remain to be explored.

32  
33 Similar approaches can be applied to other TCR trajectories in different contexts e.g. across  
34 different developmental stages in human lifespan, diseases and *in vitro* settings. It remains to  
35 be seen whether a VDJ-based trajectory can be utilized in T cell activation. Furthermore, this  
36 approach has not been optimized for BCR trajectories, as we are limited by the small number  
37 of B progenitors in the existing dataset collections. Further, BCRs have additional  
38 rearrangement rules that need to be considered e.g. somatic hypermutation, differential  
39 rearrangement events leading to asymmetric usage of kappa and lambda light chains and light  
40 chain editing processes<sup>45</sup>, as well as recently described light chain coherence in COVID-19<sup>46</sup>.  
41 We hope to improve on these aspects in a future iteration of *Dandelion* when more single-cell  
42 V(D)J data become available.

43

1 The second case study extended the observations of non-productive V(D)J contig  
2 representation in 10X Genomics' single-cell data, which has been largely ignored and/or not  
3 easily accessible with other existing workflows e.g. *scirpy*<sup>13</sup> and *imccantation*<sup>14</sup>. Our  
4 unexpected finding that B1 cells and pre-pro B cells were expressing relatively higher levels  
5 of non-productive TRB contigs suggest that B1 lineage commitment diverged earlier than  
6 expected, some time between the pre-pro B stage and pro-B stage. The conventional B cell  
7 differentiation route is thought to start from pre-pro B cells, the earliest cells that are  
8 committed to B lineage. The cells then progress through the pro- and pre-B cell stages,  
9 rearranging their BCR heavy and light chains respectively, while expressing the pre-BCR,  
10 and then emerge as immature B cells with a productive BCR and then finally differentiate  
11 into mature naive B cells<sup>47</sup>. We recently identified a putative B1-like cell cluster in our atlas  
12 of human developing immunity<sup>3</sup>, but were unable to definitively locate cells with similar  
13 characteristics in adult human tissues<sup>5</sup>. We posit that this could be due to altered development  
14 processes in the bone marrow between fetuses and adults, as pre-pro B cells are almost  
15 undetectable in adult bone marrow<sup>48</sup>. While lineage specificity of RAG1/RAG2 binding  
16 activity was previously reported in mice<sup>49</sup>, it is unknown if they have similar lineage binding  
17 specificities in human fetal B progenitors. Our observations are consistent with findings in  
18 murine B1s, which were shown to bypass the pre-BCR selection stage<sup>50,51</sup> that normally  
19 happens in pre-B cells to remove self-reactive B cells. This may also explain why B1 cells  
20 have BCRs with shorter non-coded/palindromic (N/P) nucleotide insertions<sup>3</sup>, due to  
21 negligible expression of DNTP in pre-pro B but much higher expression in pro- and late pro-  
22 B cells<sup>3</sup>.

23  
24 The enrichment of the non-productive TRB contigs is not just found in the pre-pro B and B1  
25 cells, but also in NK and ILC lineage cells along with non-productive TRG and TRD. The  
26 latter lineage is easier to explain as partial recombination of TCR has been reported in murine  
27 ILC<sup>37,38</sup> and our findings support the 'abandoned' DN theory<sup>39</sup>. The hypothesis is that  
28 ILC/NK cells are originally on a canonical T cell development trajectory, but subsequently  
29 influenced to abort this process, resulting in sustained expression of non-productive TCR  
30 rearrangements whilst developing into ILC/NK. Perhaps this is driven by overexpression of  
31 key transcription factors such as *ID2* and *ZBTB16*<sup>39,40</sup>, or lack of NOTCH signaling<sup>39</sup>. While  
32 we cannot rule out other routes of ILC/NK development, our new insights do support the  
33 notion that T and NK/ILC developments partially overlap but diverge before productive  
34 TCRs are rearranged. Our analysis has further revealed that transcription factor expression  
35 trends in DN T development in human thymus are different to mice, with only a handful of  
36 factors showing conserved trends. Our analysis offers new insights into transcription factors  
37 and surface marker genes that define DN T cell stages at high resolution, opening avenues for  
38 future in-depth investigation.

39  
40 In summary, we present *Dandelion* as an easy-to-use package/pipeline for integrative  
41 analyses of single-cell GEX and V(D)J data modality. The package is freely available online  
42 at <https://github.com/zktuong/dandelion> with tutorials and demo cases and is actively updated  
43 for further improvements. The pseudo-bulk V(D)J data is also publicly available for use as a  
44 reference to project or align new query data e.g. for disease samples such as cancers that

1 originate from T cells. We hope that the software and the resource will be useful to the  
2 community for exploring lymphocyte biology in the single-cell space, generating new  
3 insights that will help advance our understanding of immune cell development and function  
4 in health and disease.

# 1 Main Figures

a

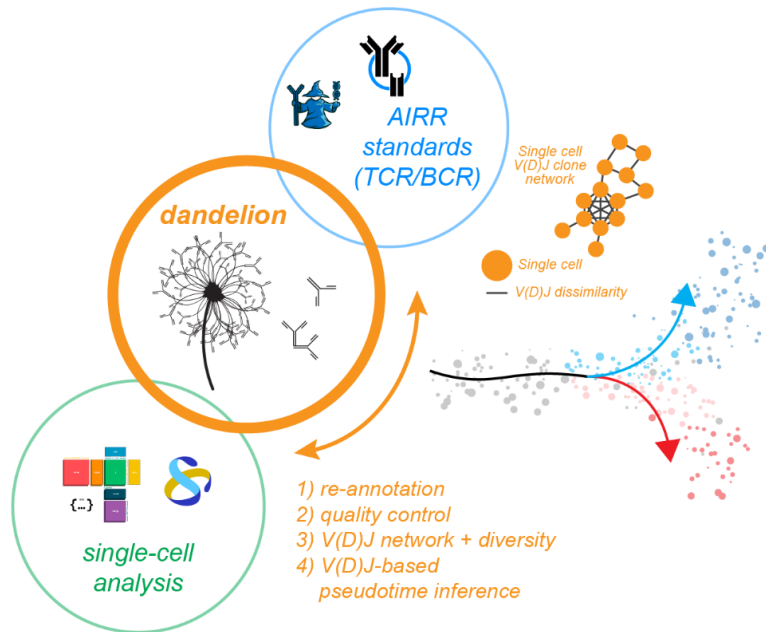

b

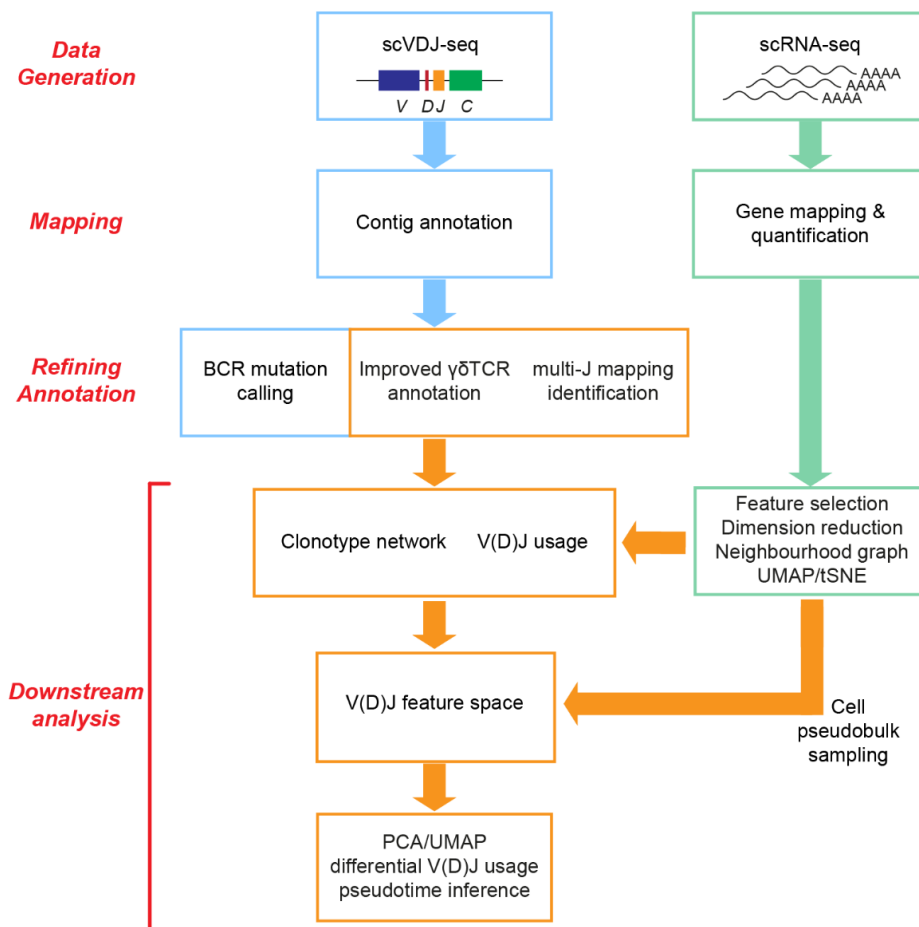

2

3 **Fig. 1 | Holistic scVDJ-seq analysis pipeline.** a, Schematic illustration showing that  
 4 *Dandelion* bridges methods from single-cell V(D)J workflows such as AIRR standards and

1 the single-cell gene expression analysis software, and combines with them additional novel  
2 methods of its own to create a holistic pipeline for analysts. **b**, Schematic illustration of the  
3 *Dandelion* workflow. Paired single-cell gene expression (scRNA-seq) and AgR repertoire  
4 (scVDJ-seq) data is generated, followed by mapping of the sequencing reads. From the  
5 mapped results, *Dandelion* provides refined contig annotations with BCR mutation calling,  
6 improved  $\gamma\delta$ TCR mapping and identification of multi-J mapping contigs. It also provides  
7 downstream analysis after integration with scRNA-seq results. Apart from allowing the users  
8 to explore clonotype networks and V(D)J usage, *Dandelion* also supports building a V(D)J  
9 feature space on pseudo-bulked cells, that can be used for differential V(D)J usage and  
10 pseudotime inference. Additional unique features provided by *Dandelion* are boxed in  
11 orange.

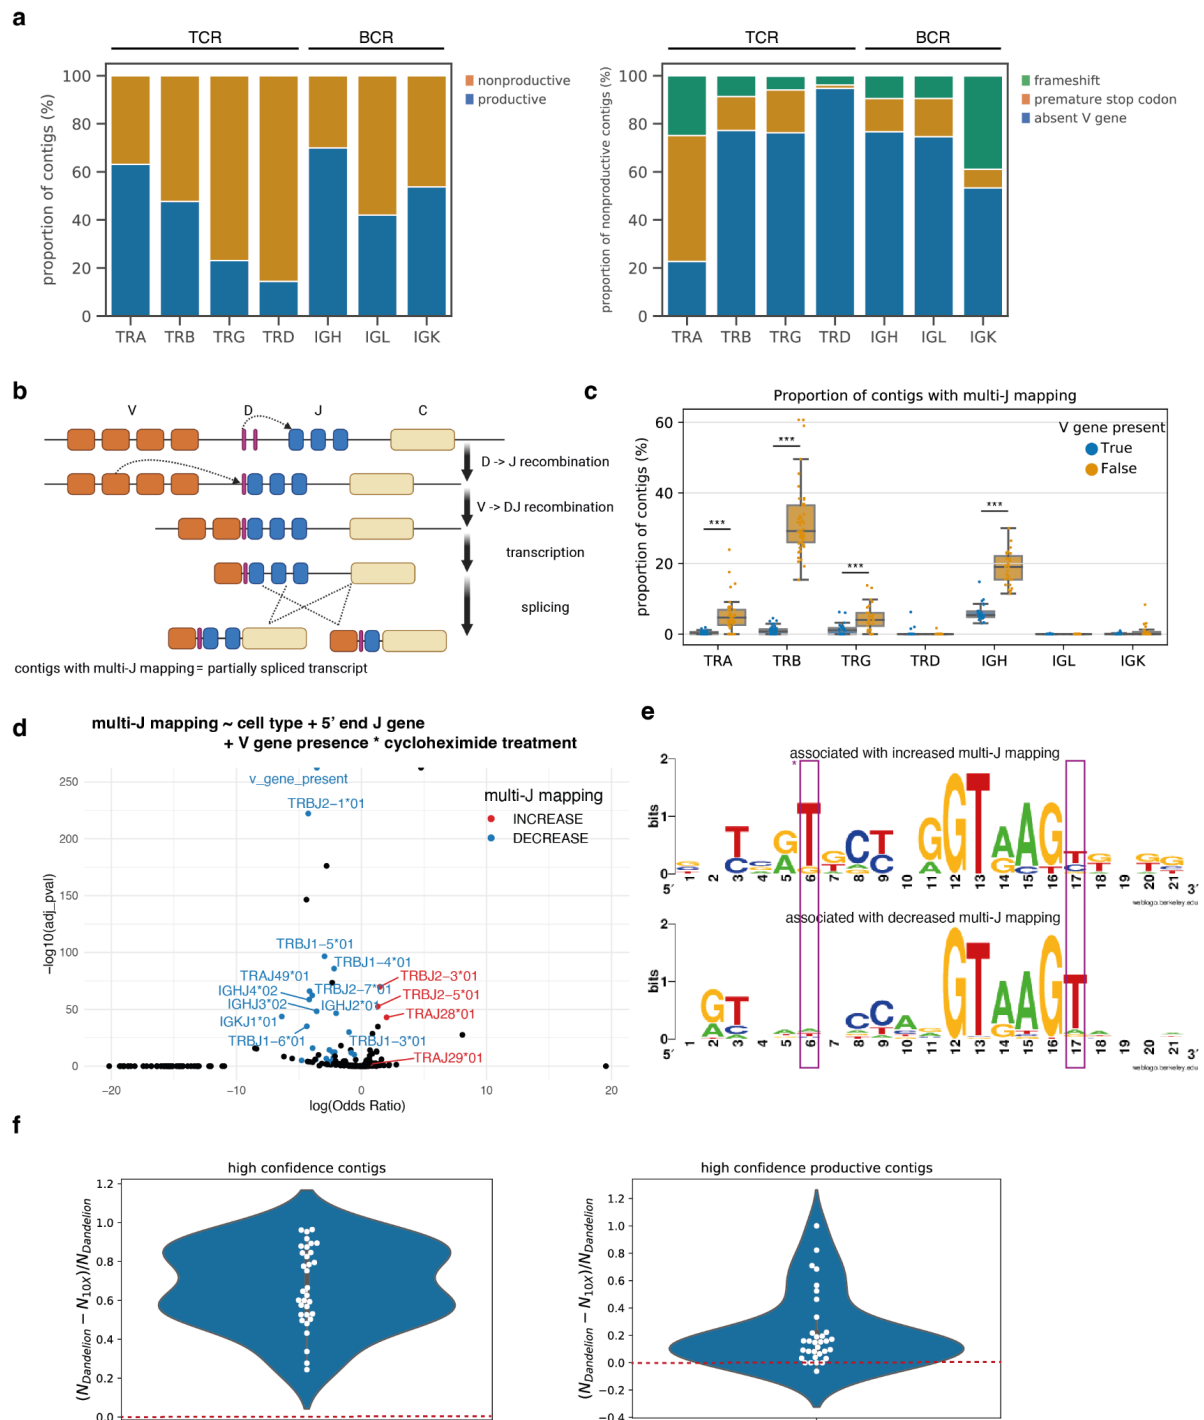

1  
2 **Fig. 2 | *Dandelion* offers improved contig annotations.** **a**, Left: barplot of proportion of  
3 contigs that are productive or non-productive in each locus. Right: barplot showing the causes  
4 of non-productive contigs in each locus. For both plots, sc- $\gamma\delta$ TCR, - $\alpha\beta$ TCR and -BCR data  
5 were taken from Suo et al. 2022<sup>3</sup>. **b**, Schematic illustration of the V(D)J rearrangement  
6 process and the potential cause of multi-J mapping with sequential mapped J genes on the  
7 same contig. **c**, Boxplot of the proportion of contigs with multi-J mapping, in the presence  
8 (blue) or absence (orange) of V genes. Each point represents a sample and data were taken  
9 from Suo et al. 2022<sup>3</sup>. Only samples with at least 10 contigs are shown. Boxes capture the  
10 first to third quartiles and whiskers span a further 1.5X interquartile range on each side of the  
11 box. For each locus, the proportions in contigs with and without V genes were compared by



1 the Wilcoxon rank sum test.  $P$ -values less than 0.001 were marked with \*\*\* ( $P$ -value for  
2 TRA:  $1.1 \times 10^{-9}$ ; TRB:  $3.3 \times 10^{-19}$ ; TRG:  $6.5 \times 10^{-5}$ ; TRD: 0.49; IGH:  $6.6 \times 10^{-11}$ ; IGL: 0.84;  
3 IGK: 0.096). **d**, Top: logistic regression formula to explore factors associated with multi-J  
4 mapping. Bottom: volcano plot summarizing logistic regression results using data from Suo  
5 et al. 2022<sup>3</sup>. The  $y$ -axis is the  $-\log_{10}$ (BH adjusted  $P$ -value) and the  $x$ -axis is  $\log$ (odds ratio).  
6 The variables that were also significant in our control/cycloheximide-treated PBMC dataset  
7 were highlighted in red (associated with increased multi-J mapping) or blue (associated with  
8 decreased multi-J mapping). **e**, Sequence logos of sequences covering the last 10 nucleotides  
9 at 3' ends (position 1 to 10) and the first 11 nucleotides of the neighboring intron (position 11  
10 to 21) for genes associated with increased (top) or decreased (bottom) multi-J mapping. J  
11 genes associated with increased multi-J mapping were less likely to have T in position 17 ( $P$ -  
12 value 0.052 in logistic regression) and 'GTAAGT' is a known consensus motif for splicing in  
13 position 12 to 17 i.e. +1 to +6 in the intron. They were also more likely to have T in position  
14 6 ( $P$ -value 0.019 in logistic regression) although the effect on splicing is unknown. **f**,  
15 Swarmplots of fraction difference of sc- $\gamma\delta$ TCR contigs annotated by *Dandelion* versus 10X  
16 *cellranger vdj* (v6.1.2) using data from Suo et al. 2022<sup>3</sup>. The red dashed line marks the  
17 threshold of 0, above which *Dandelion* recovers more  $\gamma\delta$ TCR contigs than 10X. Left: all high  
18 confidence contigs. Right: high confidence productive contigs.

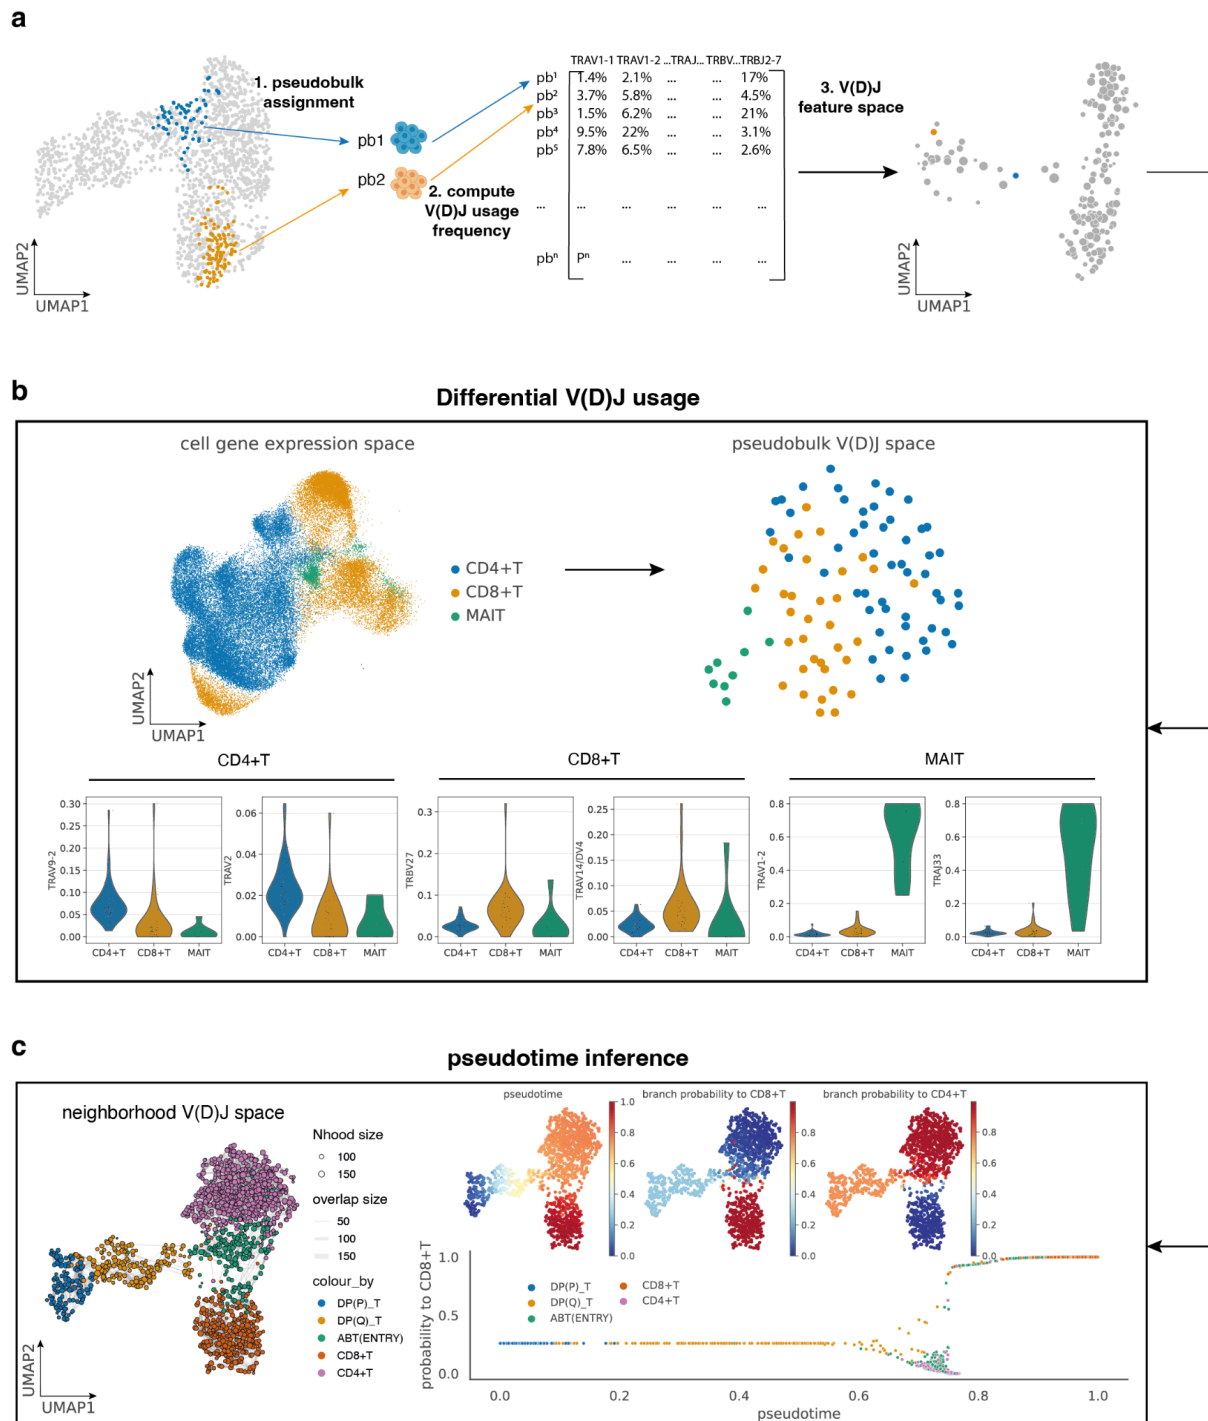

1  
2 **Fig. 3 | Creating a V(D)J feature space.** **a**, Schematic illustration of the workflow of  
3 creating a V(D)J feature space. Step 1: cells are assigned to pseudo-bulks, which can be  
4 based on metadata features, or partially overlapping cell neighborhoods. Step 2: V(D)J usage  
5 frequency per pseudo-bulk is computed for each gene, and used as input of the V(D)J feature  
6 space. Step 3: the V(D)J feature space can be visualized with conventional dimension  
7 reduction techniques such as PCA or UMAP, and it can then be utilized for differential V(D)J  
8 usage analysis and pseudotime inference. **b**, Top left: gene expression UMAP of all T cells  
9 from adult human tissues in Conde et al. 2022<sup>5</sup>, colored by low-level cell type annotations.  
10 Each point represents a cell. Top right: UMAP of the pseudo-bulk V(D)J feature space of the  
11 same cells. Each point represents a cell pseudo-bulk. Bottom panel: top two differentially

1 expressed TCR genes in CD4+T cells, CD8+T cells and MAIT cells. **c**, Left: UMAP of  
2 neighborhood V(D)J feature space covering DP to mature T cells with paired productive  
3  $\alpha\beta$ TCR in data from Suo et al. 2022<sup>3</sup>. Each point represents a cell neighborhood, colored by  
4 the dominant cell type in each neighborhood. The point size represents neighborhood size,  
5 with connecting edges representing overlapping cell numbers between any two  
6 neighborhoods. Only edges with more than 30 overlapping cells are shown. Right top:  
7 inferred pseudotime, and branch probabilities to CD8+T and to CD4+T respectively overlaid  
8 onto the same UMAP embedding on the left. Right bottom: scatterplot of branch probability  
9 to CD8+T against pseudotime. Each point represents a cell neighborhood, colored by the  
10 dominant cell type in each neighborhood.

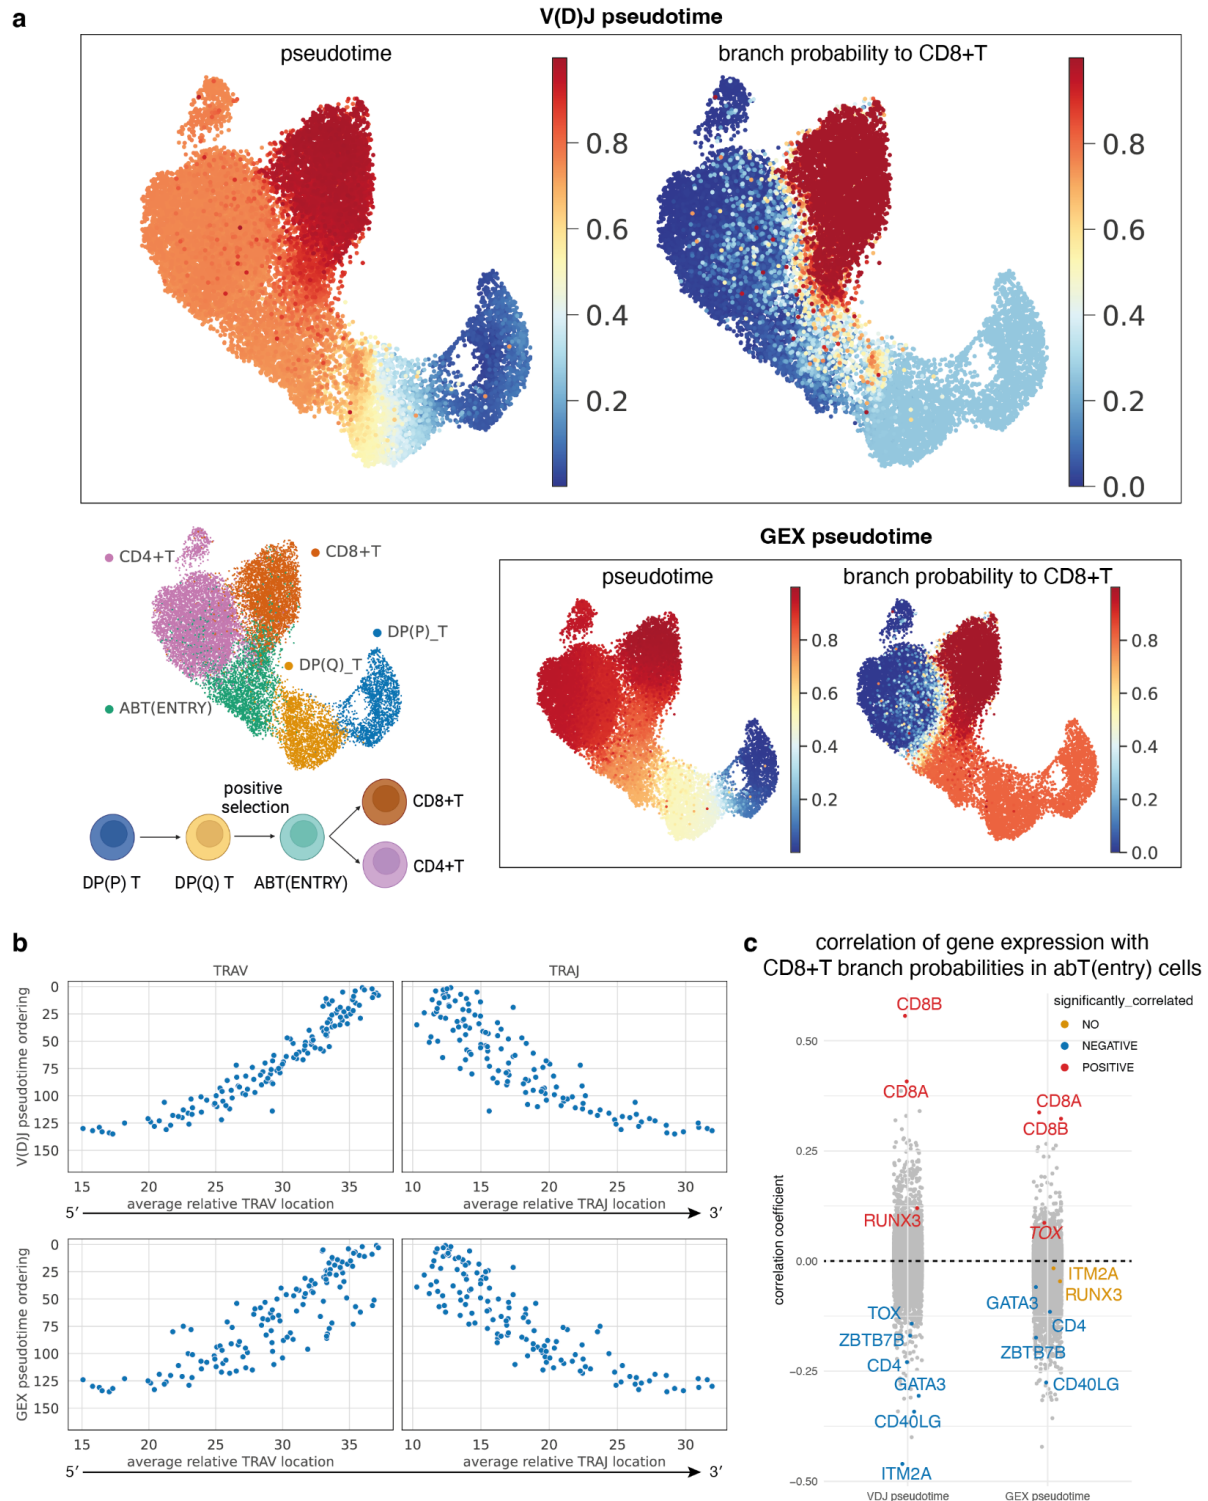

1

2 **Fig. 4 | Comparing pseudotime inferred from V(D)J space or gene expression (GEX)**

3 **space. a**, Top: pseudotime and branch probability to CD8+T inferred from neighborhood  
 4 V(D)J space in Fig. 3c, projected back to the cells, overlaid onto the same UMAP embedding  
 5 as in the top left panel. Left bottom: UMAP of DP to mature T cells with paired productive  
 6  $\alpha\beta$ TCR in data from Suo et al. 2022<sup>3</sup>. Each point represents a cell, colored by cell types.  
 7 Underneath the UMAP is a schematic showing the T cell differentiation process. Right  
 8 bottom: pseudotime and branch probability to CD8+T inferred from neighborhood GEX  
 9 space, projected back to the cells, overlaid onto the same UMAP embedding as in the top left

1 panel. **b**, Scatterplots of the pseudotime ordering against the average relative TRAV or TRAJ  
2 location. Each point represents a cell neighborhood. Each TRAV or TRAJ gene is encoded  
3 numerically for its relative genomic order. The *x*-axis represents the average TRAV/TRAJ  
4 relative location for each cell neighborhood. Top: results from pseudotime inferred from  
5 neighborhood V(D)J space. Bottom: results from pseudotime inferred from neighborhood  
6 GEX space. **c**, Stripplot of correlation coefficients of gene expression with branch  
7 probabilities to CD8+T within abT(entry) cells, for branch probabilities inferred from  
8 neighborhood V(D)J space and neighborhood GEX space separately. Only genes that are  
9 known CD4+/CD8+T cell markers or TFs involved in CD8+T/CD4+T lineage decision are  
10 labeled, and colored. The rest of the genes are grayed out. Labeled genes that had significant  
11 (BH adjusted *P*-value < 0.05) positive correlations were colored in red, the ones with  
12 significant negative correlations were colored in blue, and those without significant  
13 correlations were colored in orange.

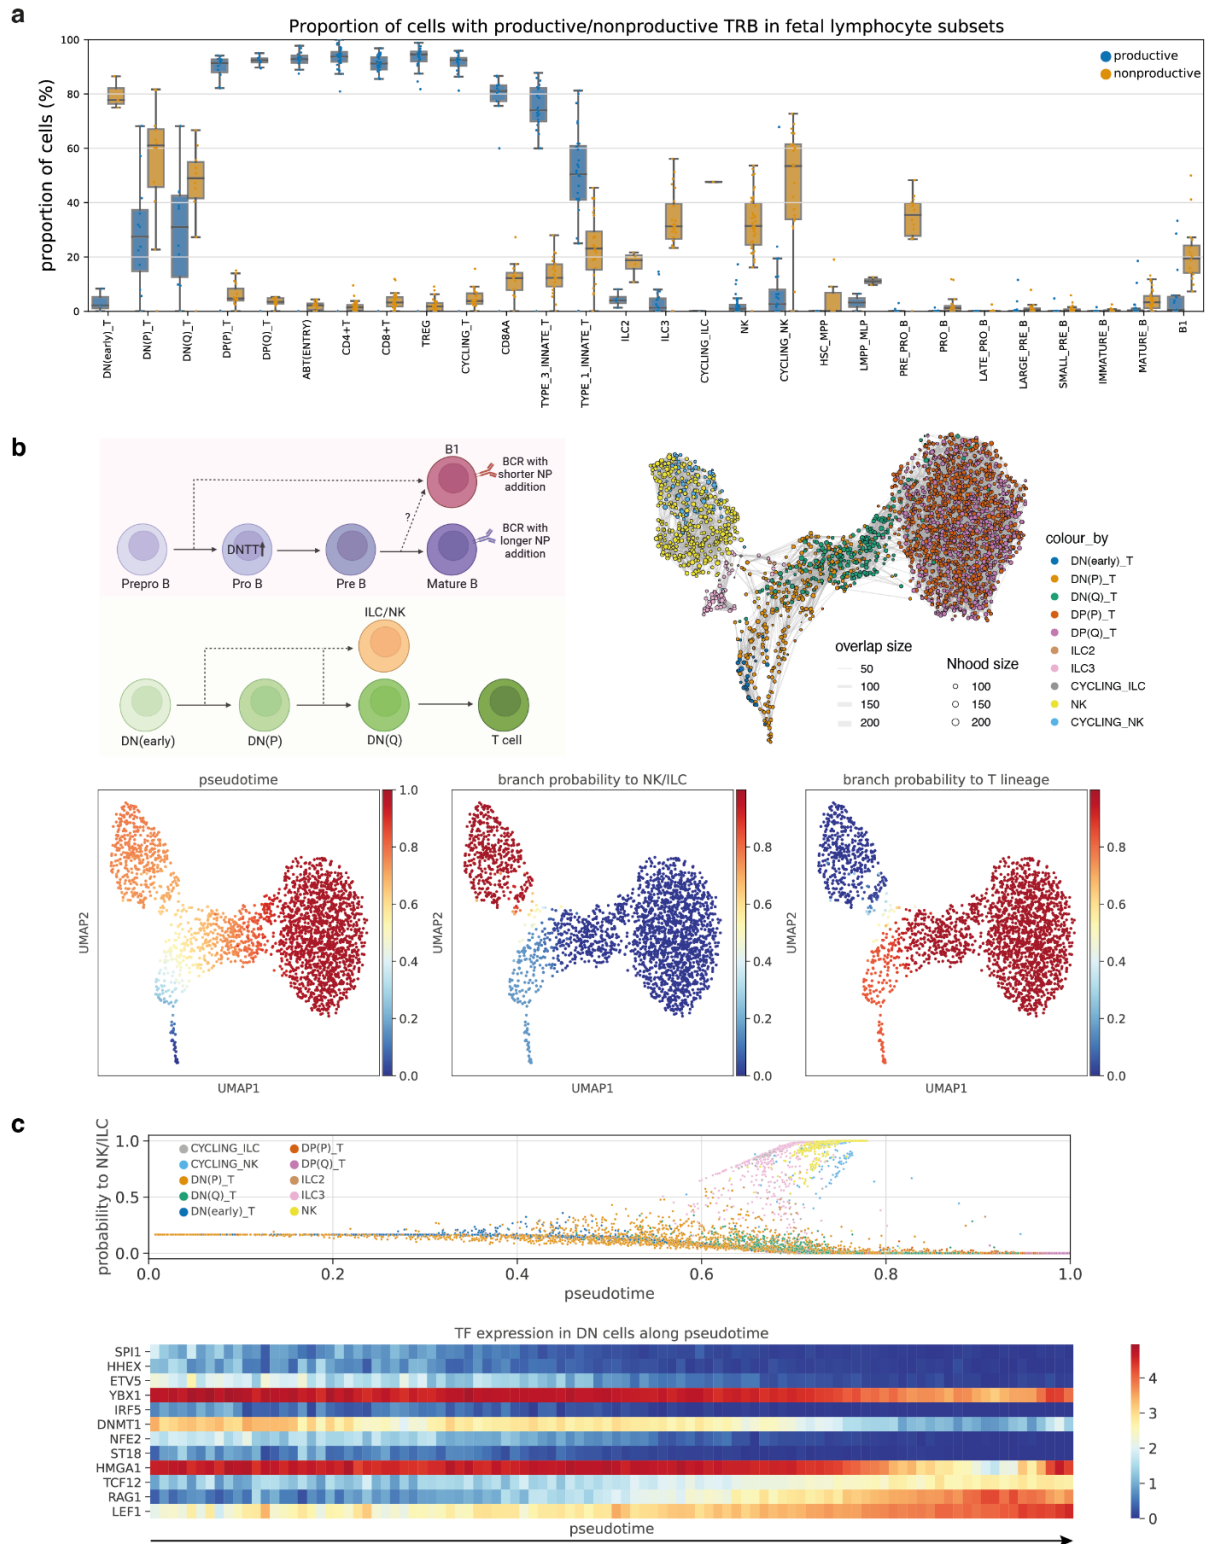

1

2 **Fig. 5 | Non-productive TCR reveals B1 origin and ILC/NK lineage development. a,**

3 Boxplot of the proportion of cells with productive (blue) or non-productive (orange) TRB in

1 different fetal lymphocyte subsets. Each point represents a sample and data were taken from  
2 Suo et al. 2022<sup>3</sup>. Only samples with at least 20 cells are shown. Boxes capture the first to  
3 third quartiles and whiskers span a further 1.5X interquartile range on each side of the box. The  
4 annotations used here were based on the version whereby the exact identity of cycling B cells  
5 was predicted to be immature B, mature B, B1 or plasma B cells using *Celltypist*<sup>3,5</sup>. The  
6 equivalent boxplot using the original annotations is shown in **Supplementary Fig. 6a. b**, Top  
7 left: schematic illustration showing the proposed development of B cells (top panel), and  
8 relationship between ILC/NK and T cell lineages. Top right: UMAP of neighborhood V(D)J  
9 feature space covering ILC, NK and developing T cells with TRBJ in data from Suo et al.  
10 2022<sup>3</sup>. Each point represents a cell neighborhood, colored by cell types. The point size  
11 represents neighborhood size, with connecting edges representing overlapping cell numbers  
12 between any two neighborhoods. Only edges with more than 30 overlapping cells are shown.  
13 Bottom: inferred pseudotime, and branch probabilities to ILC/NK and T lineage respectively  
14 overlaid onto the same UMAP embedding on the top right. **c**, Top: scatterplot of branch  
15 probability to ILC/NK lineage against pseudotime. The pseudotime was inferred from  
16 neighborhood V(D)J space shown in Fig. 5b and projected back cells. Each point represents a  
17 cell, colored by cell types. Bottom: heatmap of TF expressions across pseudotime in DN T  
18 cells. Pseudotime is equally divided into 100 bins, and the average gene expression is  
19 calculated for DN T cells with pseudotime that falls within each bin. Genes selected here are  
20 TFs that had significantly high Chatterjee's correlation<sup>52</sup> with pseudotime (BH adjusted *P*-  
21 value < 0.05, and correlation coefficient > 0.1).

## 1 **References**

- 2 1. Papalexi, E. & Satija, R. Single-cell RNA sequencing to explore immune cell  
3 heterogeneity. *Nat. Rev. Immunol.* **18**, 35–45 (2018).
- 4 2. Efremova, M., Vento-Tormo, R., Park, J.-E., Teichmann, S. A. & James, K. R.  
5 Immunology in the Era of Single-Cell Technologies. *Annu. Rev. Immunol.* **38**, 727–757  
6 (2020).
- 7 3. Suo, C. *et al.* Mapping the developing human immune system across organs. *Science*  
8 **376**, eabo0510 (2022).
- 9 4. Stephenson, E. *et al.* Single-cell multi-omics analysis of the immune response in  
10 COVID-19. *Nat. Med.* **27**, 904–916 (2021).
- 11 5. Domínguez Conde, C. *et al.* Cross-tissue immune cell analysis reveals tissue-specific  
12 features in humans. *Science* **376**, eabl5197 (2022).
- 13 6. Park, J.-E. *et al.* A cell atlas of human thymic development defines T cell repertoire  
14 formation. *Science* **367**, (2020).
- 15 7. Lance, C. *et al.* Multimodal single cell data integration challenge: results and lessons  
16 learned. *bioRxiv* 2022.04.11.487796 (2022) doi:10.1101/2022.04.11.487796.
- 17 8. Lee, J., Hyeon, D. Y. & Hwang, D. Single-cell multiomics: technologies and data  
18 analysis methods. *Exp. Mol. Med.* **52**, 1428–1442 (2020).
- 19 9. Roth, D. B. V(D)J Recombination: Mechanism, Errors, and Fidelity. *Microbiol Spectr* **2**,  
20 (2014).
- 21 10. Vander Heiden, J. A. *et al.* AIRR Community Standardized Representations for  
22 Annotated Immune Repertoires. *Front. Immunol.* **9**, (2018).
- 23 11. Rubelt, F. *et al.* Adaptive Immune Receptor Repertoire Community recommendations  
24 for sharing immune-repertoire sequencing data. *Nat. Immunol.* **18**, 1274–1278 (2017).
- 25 12. Breden, F. *et al.* Reproducibility and Reuse of Adaptive Immune Receptor Repertoire



- 1       Data. *Front. Immunol.* **8**, 1418 (2017).
- 2   13. Sturm, G. *et al.* Scirpy: a Scanpy extension for analyzing single-cell T-cell receptor-  
3       sequencing data. *Bioinformatics* **36**, 4817–4818 (2020).
- 4   14. Gupta, N. T. *et al.* Change-O: a toolkit for analyzing large-scale B cell immunoglobulin  
5       repertoire sequencing data. *Bioinformatics* **31**, 3356–3358 (2015).
- 6   15. Wolf, F. A., Angerer, P. & Theis, F. J. SCANPY: large-scale single-cell gene expression  
7       data analysis. *Genome Biol.* **19**, 15 (2018).
- 8   16. Virshup, I., Rybakov, S., Theis, F. J., Angerer, P. & Alexander Wolf, F. anndata:  
9       Annotated data. *bioRxiv* 2021.12.16.473007 (2021) doi:10.1101/2021.12.16.473007.
- 10  17. Ye, J., Ma, N., Madden, T. L. & Ostell, J. M. IgBLAST: an immunoglobulin variable  
11       domain sequence analysis tool. *Nucleic Acids Res.* **41**, W34–40 (2013).
- 12  18. Lefranc, M. P. *et al.* IMGT, the international ImMunoGeneTics database. *Nucleic Acids*  
13       *Res.* **27**, 209–212 (1999).
- 14  19. Le Hir, H., Gatfield, D., Izaurralde, E. & Moore, M. J. The exon–exon junction complex  
15       provides a binding platform for factors involved in mRNA export and nonsense-  
16       mediated mRNA decay. *EMBO J.* **20**, 4987–4997 (2001).
- 17  20. Irimia, M. *et al.* Complex selection on 5' splice sites in intron-rich organisms. *Genome*  
18       *Res.* **19**, 2021–2027 (2009).
- 19  21. Dann, E., Henderson, N. C., Teichmann, S. A., Morgan, M. D. & Marioni, J. C.  
20       Differential abundance testing on single-cell data using k-nearest neighbor graphs. *Nat.*  
21       *Biotechnol.* **40**, 245–253 (2022).
- 22  22. Saelens, W., Cannoodt, R., Todorov, H. & Saeys, Y. A comparison of single-cell  
23       trajectory inference methods. *Nat. Biotechnol.* **37**, 547–554 (2019).
- 24  23. Setty, M. *et al.* Characterization of cell fate probabilities in single-cell data with Palantir.  
25       *Nat. Biotechnol.* **37**, 451–460 (2019).

- 1 24. Schattgen, S. A. *et al.* Integrating T cell receptor sequences and transcriptional profiles  
2 by clonotype neighbor graph analysis (CoNGA). *Nat. Biotechnol.* **40**, 54–63 (2022).
- 3 25. Carico, Z. M., Roy Choudhury, K., Zhang, B., Zhuang, Y. & Krangel, M. S. Tcrd  
4 Rearrangement Redirects a Processive Tcr Recombination Program to Expand the Tcrd  
5 Repertoire. *Cell Rep.* **19**, 2157–2173 (2017).
- 6 26. Singer, A., Adoro, S. & Park, J.-H. Lineage fate and intense debate: myths, models and  
7 mechanisms of CD4- versus CD8-lineage choice. *Nat. Rev. Immunol.* **8**, 788–801  
8 (2008).
- 9 27. Karimi, M. M. *et al.* The order and logic of CD4 versus CD8 lineage choice and  
10 differentiation in mouse thymus. *Nat. Commun.* **12**, 1–14 (2021).
- 11 28. Kirchner, J. & Bevan, M. J. ITM2A is induced during thymocyte selection and T cell  
12 activation and causes downregulation of CD8 when overexpressed in CD4(+)CD8(+)  
13 double positive thymocytes. *J. Exp. Med.* **190**, 217–228 (1999).
- 14 29. Taniuchi, I. *et al.* Differential requirements for Runx proteins in CD4 repression and  
15 epigenetic silencing during T lymphocyte development. *Cell* **111**, 621–633 (2002).
- 16 30. Sato, T. *et al.* Dual functions of Runx proteins for reactivating CD8 and silencing CD4  
17 at the commitment process into CD8 thymocytes. *Immunity* **22**, 317–328 (2005).
- 18 31. He, X. *et al.* The zinc finger transcription factor Th-POK regulates CD4 versus CD8 T-  
19 cell lineage commitment. *Nature* **433**, 826–833 (2005).
- 20 32. Sun, G. *et al.* The zinc finger protein cKrox directs CD4 lineage differentiation during  
21 intrathymic T cell positive selection. *Nat. Immunol.* **6**, 373–381 (2005).
- 22 33. Aliahmad, P. & Kaye, J. Development of all CD4 T lineages requires nuclear factor  
23 TOX. *J. Exp. Med.* **205**, 245–256 (2008).
- 24 34. Hernández-Hoyos, G., Anderson, M. K., Wang, C., Rothenberg, E. V. & Alberola-Ila, J.  
25 GATA-3 expression is controlled by TCR signals and regulates CD4/CD8

- 1 differentiation. *Immunity* **19**, 83–94 (2003).
- 2 35. Pai, S.-Y. *et al.* Critical roles for transcription factor GATA-3 in thymocyte  
3 development. *Immunity* **19**, 863–875 (2003).
- 4 36. Graf, R. *et al.* BCR-dependent lineage plasticity in mature B cells. *Science* **363**, 748–753  
5 (2019).
- 6 37. Shin, S. B. *et al.* Abortive  $\gamma\delta$ TCR rearrangements suggest ILC2s are derived from T-cell  
7 precursors. *Blood Adv* **4**, 5362–5372 (2020).
- 8 38. Qian, L. *et al.* Suppression of ILC2 differentiation from committed T cell precursors by  
9 E protein transcription factors. *Journal of Experimental Medicine* vol. 216 884–899  
10 Preprint at <https://doi.org/10.1084/jem.20182100> (2019).
- 11 39. Shin, S. B. & McNagny, K. M. ILC-You in the Thymus: A Fresh Look at Innate  
12 Lymphoid Cell Development. *Front. Immunol.* **12**, 681110 (2021).
- 13 40. Hosokawa, H. & Rothenberg, E. V. How transcription factors drive choice of the T cell  
14 fate. *Nat. Rev. Immunol.* **21**, 162–176 (2021).
- 15 41. Mak, T. W. & Saunders, M. E. The immune response. *Part I: Basic Immunology* 373–  
16 401 (2006).
- 17 42. Charles, A., Janeway, J., Travers, P. & Walport, M. Immunobiology: the immune  
18 system in health and disease. *Current Biology Ltd./Garland*.
- 19 43. Elhanati, Y. *et al.* Inferring processes underlying B-cell repertoire diversity. *Philos.*  
20 *Trans. R. Soc. Lond. B Biol. Sci.* **370**, (2015).
- 21 44. Sethna, Z. *et al.* Population variability in the generation and selection of T-cell  
22 repertoires. *PLoS Comput. Biol.* **16**, e1008394 (2020).
- 23 45. Okoreeh, M. K. *et al.* Asymmetrical forward and reverse developmental trajectories  
24 determine molecular programs of B cell antigen receptor editing. *Sci Immunol* **7**,  
25 eabm1664 (2022).

- 1 46. Jaffe, D. B. *et al.* Functional antibodies exhibit light chain coherence. *Nature* (2022)  
2 doi:10.1038/s41586-022-05371-z.
- 3 47. Clark, M. R., Mandal, M., Ochiai, K. & Singh, H. Orchestrating B cell lymphopoiesis  
4 through interplay of IL-7 receptor and pre-B cell receptor signalling. *Nat. Rev. Immunol.*  
5 **14**, 69–80 (2014).
- 6 48. O’Byrne, S. *et al.* Discovery of a CD10-negative B-progenitor in human fetal life  
7 identifies unique ontogeny-related developmental programs. *Blood* **134**, 1059–1071  
8 (2019).
- 9 49. Ji, Y. *et al.* The in vivo pattern of binding of RAG1 and RAG2 to antigen receptor loci.  
10 *Cell* **141**, 419–431 (2010).
- 11 50. Wong, J. B. *et al.* B-1a cells acquire their unique characteristics by bypassing the pre-  
12 BCR selection stage. *Nat. Commun.* **10**, 4768 (2019).
- 13 51. Kitamura, D. *et al.* A critical role of  $\lambda 5$  protein in B cell development. *Cell* **69**, 823–831  
14 (1992).
- 15 52. Chatterjee, S. A New Coefficient of Correlation. *J. Am. Stat. Assoc.* **116**, 2009–2022  
16 (2021).
- 17 53. Gadala-Maria, D., Yaari, G., Uduman, M. & Kleinstein, S. H. Automated analysis of  
18 high-throughput B-cell sequencing data reveals a high frequency of novel  
19 immunoglobulin V gene segment alleles. *Proc. Natl. Acad. Sci. U. S. A.* **112**, E862–70  
20 (2015).
- 21 54. Sleckman, B. P., Khor, B., Monroe, R. & Alt, F. W. Assembly of productive T cell  
22 receptor delta variable region genes exhibits allelic inclusion. *J. Exp. Med.* **188**, 1465–  
23 1471 (1998).
- 24 55. Hu, Y. Efficient, high-quality force-directed graph drawing. *Mathematica journal*  
25 (2005).

- 1 56. Peixoto, T. P. The graph-tool python library. (2017)  
2 doi:10.6084/M9.FIGSHARE.1164194.
- 3 57. Wolock, S. L., Lopez, R. & Klein, A. M. Scrublet: Computational Identification of Cell  
4 Doublets in Single-Cell Transcriptomic Data. *Cell Syst* **8**, 281–291.e9 (2019).
- 5 58. Benjamini, Y. & Hochberg, Y. Controlling the false discovery rate: A practical and  
6 powerful approach to multiple testing. *J. R. Stat. Soc.* **57**, 289–300 (1995).
- 7 59. Crooks, G. E., Hon, G., Chandonia, J.-M. & Brenner, S. E. WebLogo: a sequence logo  
8 generator. *Genome Res.* **14**, 1188–1190 (2004).
- 9 60. Kerby, D. S. The Simple Difference Formula: An Approach to Teaching Nonparametric  
10 Correlation. *Comprehensive Psychology* **3**, 11.IT.3.1 (2014).
- 11 61. Lopez, R., Regier, J., Cole, M. B., Jordan, M. I. & Yosef, N. Deep generative modeling  
12 for single-cell transcriptomics. *Nat. Methods* **15**, 1053–1058 (2018).
- 13 62. Lambert, S. A. *et al.* The Human Transcription Factors. *Cell* **175**, 598–599 (2018).

## 1 **Methods**

### 2 ***Dandelion***

#### 3 *Pre-processing*

4 *Dandelion* can run the pre-processing of data using the standard outputs from all *cellranger*  
5 *vdj* versions. In this manuscript, single-cell V(D)J data from the 5' Chromium 10X kit were  
6 initially processed with *cellranger vdj* pipeline (v6.1.2) with *cellranger vdj* reference  
7 (v5.0.0). TCR and BCR contigs contained in '*all\_contigs.fasta*' and  
8 '*all\_contig\_annotations.csv*' from all three library types ( $\alpha\beta$ TCR,  $\gamma\delta$ TCR and BCR) were  
9 then reannotated using an *immcantation*-inspired<sup>14</sup> pre-processing pipeline contained in the  
10 *Dandelion* singularity container (v0.3.0).

11

12 The pre-processing pipeline includes the following steps:

- 13 i) adjust cell and contig barcodes by adding user-supplied suffixes and/or prefixes to  
14 ensure that there are no overlapping barcodes between samples;
- 15 ii) optionally subset to contigs deemed high confidence in the *cellranger* output; this was  
16 done in the analysis performed here;
- 17 iii) re-annotation of contigs with *igblastn* (v1.19.0) against IMGT (international  
18 ImMunoGeneTics) reference sequences (last downloaded: 01/08/2021) with the  
19 following parameters: minimum D gene nucleotide match = 9, V gene e-value cutoff  
20 =  $10^{-4}$ ;
- 21 iv) re-annotation of D and J genes separately using *blastn* with similar parameters as per  
22 *igblastn*<sup>17</sup> (dust = "no", word size (J = 7; D = 9)) but with an additional e-value cutoff  
23 (J =  $10^{-4}$  in contrast to *igblastn*'s default cut off of 10; D =  $10^{-3}$ ). This is to enable  
24 annotation of contigs without the V gene present;
- 25 v) identification and recovery of non-overlapping individual J gene segments (under  
26 associated '*j\_chain\_multimapper*' columns). In the list of all mapped J genes  
27 (*all\_contig\_j\_blast.tsv*) from *blastn*, the J gene with the highest score (*j\_support*) was  
28 chosen. *Dandelion* then looks for the next J gene with the highest '*j\_support*' value,  
29 and with start (*j\_sequence\_start*) and end (*j\_sequence\_end*) position not overlapping  
30 with the selected J gene, and does so iteratively until the list of all mapped J genes is  
31 exhausted. In contigs without V gene annotations, we then select the 5' end leftmost J  
32 gene and update the '*j\_call*' column in the final AIRR table. For contigs with V gene  
33 annotations, but with multiple J gene calls, we use the annotations provided by  
34 *igblastn* (NCBI IgBLAST Release 1.19.0's release notes states that they "*\*Added*  
35 *logic to handle the case where there is an unrearranged J gene downstream of the*  
36 *VDJ rearrangement.*").

37

38 For BCRs, there are two additional steps:

- 39 vi) additional re-annotation of heavy-chain constant (C) region calls using *blastn*  
40 (v2.13.0+) against curated sequences from CH1 regions of respective isotype class;
- 41 vii) heavy chain V gene allele correction using *tigger* (v1.0.0)<sup>53</sup>. The final outputs are then  
42 parsed into AIRR format with *change-o* scripts<sup>14</sup>.

43

1 All the outputs from each step are saved in a subfolder which the user can elect to retain or  
2 remove as per their requirements. Typically a user would proceed with the file ending with  
3 the suffix ‘*\_contig\_dandelion.tsv*’ as this represents the rearrangement sequences that pass  
4 standard quality control checks. In this manuscript, we used the data found in the  
5 ‘*all\_contig\_db-all.tsv*’ as it also contains the multi-J mapping.

6

### 7 Post-processing

8 In addition to the pre-processing steps at the contig level, post-processing, or integrating cell-  
9 level quality control, is performed using *Dandelion*’s ‘*check\_contig*’ function. The function  
10 checks through whether a rearrangement is annotated with consistent V, D, J and C gene calls  
11 and performs special operations when a cell has multiple contigs. All contigs in a cell are  
12 sorted according to the unique molecular identifier (UMI) count in a descending order and  
13 productive contigs are ordered higher than non-productive contigs. For cells with other than  
14 one pair of productive contigs (one VDJ and one VJ), the function will assess if the cell is to  
15 be flagged with having orphan (no paired VDJ or VJ chain), extra pair(s) or ambiguous  
16 (biologically irreconcilable e.g. both TCRs and BCRs in the same cell) status with some  
17 exceptions: ii) IgM and IgD are allowed to co-exist in the same B cell if no other isotypes are  
18 detected; ii) TRD and TRB contigs are allowed in the same cell because rearrangement of  
19 TRB and TRD loci happens at the same time during development and TRD variable region  
20 genes exhibits allelic inclusion<sup>54</sup>. The function also asserts a library type restriction with the  
21 rationale that the choice of the library type should mean that the primers used would most  
22 likely amplify only relevant sequences to a particular loci. Therefore, if there are any  
23 annotations to unexpected loci, these contigs likely represent artifacts and will be filtered  
24 away. A more stringent version of ‘*check\_contigs*’ is implemented in a separate function,  
25 ‘*filter\_contigs*’, which only considers productive VDJ contigs, asserts a single-cell should  
26 only have one VDJ and one VJ pair, or only an orphan VDJ chain, and explicitly removes  
27 contigs that fail these checks (with the same exceptions for IgM/IgD and TRB/TRD as per  
28 above). If a single-cell gene expression object (*AnnData*) is provided to the functions, it will  
29 also remove contigs that do not match to any cell barcodes in the gene expression data.  
30 Lastly, *Dandelion* can accept any AIRR-formatted data formats e.g. BDRhapsody VDJ data.

31

### 32 Clonotype definition and diversity

33 *Dandelion*’s mode of clonotype definition and network based diversity analysis has been  
34 previously described<sup>4</sup>. Briefly, TCRs and BCRs are grouped into clones/clonotypes based on  
35 the following sequential criteria that apply to both heavy-chain and light-chain contigs: (1)  
36 identical V and J gene usage; (2) identical junctional CDR3 amino acid length; (3) CDR3  
37 sequence similarity: for TCRs, 100% nucleotide sequence identity at the CDR3 junction is  
38 recommended while the default setting for BCRs is to use 85% amino acid sequence  
39 similarity (based on Hamming distance). Single-cell V(D)J networks are constructed using  
40 adjacency matrices computed from pairwise Levenshtein distance of the full amino acid  
41 sequence alignment for TCR/BCR(s) on a per cell basis. A minimum-spanning tree is then  
42 constructed on the adjacency matrix for each clone/clonotype, creating a simple graph with  
43 edges indicating the shortest total edit distance between a cell and its neighbor. Cells with  
44 total pairwise edit distance of zero are then connected to the graph to recover edges trimmed

1 off during the minimum-spanning-tree construction step. A graph layout is then computed  
2 either using the Fruchterman–Reingold algorithm in *networkx* ( $\geq v2.5$ ) or Scalable Force-  
3 Directed Placement algorithm implemented through *graph-tool* package<sup>55,56</sup>. Visualization of  
4 the resulting single-cell V(D)J network is achieved via transfer of the graph to relevant  
5 ‘*AnnData*’ slots, allowing for access to plotting tools in *scanpy*. The resulting V(D)J network  
6 enables computation of Gini coefficients based on cluster/cell size/centrality distributions, as  
7 discussed previously<sup>4</sup>.

### 8 9 *Pseudo-bulk V(D)J feature space*

10 Pseudo-bulk construction requires pseudo-bulk assignment information of cells, along with V  
11 and J genes for the cells’ identified primary TCR/BCR contigs (selected based on productive  
12 status and highest UMI count). The former is a cell by pseudo-bulk binary matrix which can  
13 be either explicitly provided by the user or inferred from unique combinations of cell level  
14 discrete metadata. While the code is calibrated to work with *Dandelion*’s structuring by  
15 default, it can work with any V(D)J processing provided it stores cell level information on  
16 primary per-locus V/D/J calls. The input is used to generate a pseudo-bulk by V(D)J feature  
17 space, with the V(D)J calls converted to a binary matrix, added up for each pseudo-bulk, and  
18 normalized to a unit sum on a per-pseudo-bulk, per-locus, per-segment basis. The cell by  
19 pseudo-bulk information is stored in the resulting object for potential communication with the  
20 original cell space. Utility functions are provided for compatibility with *Palantir*<sup>23</sup> output for  
21 trajectory inference.

### 22 23 **Non-productive TCR/BCR contigs**

24 Single-cell BCR,  $\alpha\beta$ TCR and  $\gamma\delta$ TCR data from Suo et al. 2022<sup>3</sup> were remapped with  
25 *cellranger vdj* (v6.1.2) and processed further using *Dandelion* as described above. For all  
26 samples, contigs were extracted from ‘*all\_contig\_igblast\_db-all.tsv*’ or in the case whereby  
27 ‘*all\_contig\_igblast\_db-all.tsv*’ was empty, ‘*all\_contig\_igblast\_db-fail.tsv*’ was used.  
28 Preprocessed and annotated scRNA-seq data was downloaded from  
29 <https://developmental.cellatlas.io/fetal-immune>. Only contigs from annotated cells were kept  
30 for downstream analysis. For each contig, productive status was obtained from the column  
31 ‘*productive*’, and the causes for non-productive contigs were extracted from ‘*vj\_in\_frame*’ (is  
32 ‘F’ if there is a frameshift), ‘*stop\_codon*’ (is ‘T’ if there is a premature stop codon) and  
33 ‘*v\_gene\_present*’ (is ‘False’ if V gene is absent) columns.

### 34 35 **Cycloheximide treatment on PBMC**

36 Frozen PBMCs (Stemcell Technologies) were thawed in pre-warmed RF10 media, which was  
37 RPMI (Sigma-Aldrich) supplemented with 10% fetal bovine serum (FBS; Gibco) and  
38 penicillin/streptomycin (Sigma-Aldrich). Cells were pelleted by centrifugation at 500g for 5  
39 min and resuspended in RF10 media, and split between two 10 cm petri dishes. Control  
40 PBMCs were then incubated in a total of 10 ml RF10 media at 37°C for 2 hr, whereas treated  
41 PBMCs were incubated in RF10 supplemented with cycloheximide (Sigma-Aldrich; final  
42 concentration of 100  $\mu\text{g/ml}$ ). After incubation, control and treated PBMCs were washed with  
43 ice cold RF10 and resuspended in 2% FBS in phosphate buffered saline (PBS; Gibco). For



1 treated PBMCs, both the washing and resuspension buffer contained 100 µg/ml  
2 cycloheximide.

3  
4 Control and treated PBMCs were then loaded onto separate channels of the Chromium chip  
5 from Chromium single cell V(D)J kit (10X Genomics 5' v2) following the manufacturer's  
6 instructions before droplet encapsulation on the Chromium controller. Single-cell cDNA  
7 synthesis, amplification, gene expression (GEX) and targeted BCR and αβTCR libraries were  
8 generated. Sequencing was performed on the Illumina Novaseq 6000 system. The gene  
9 expression libraries were sequenced at a target depth of 50,000 reads per cell using the  
10 following parameters: Read1: 26 cycles, i7: 8 cycles, i5: 0 cycles; Read2: 91 cycles to  
11 generate 75-bp paired-end reads. BCR and TCR libraries were sequenced at a target depth of  
12 5000 reads per cell.

13 Raw scRNA-seq reads were mapped with *cellranger* 3.0.2 with Ensembl 93 based GRCh38  
14 reference. Low quality cells were filtered out (minimum number of reads > 2000, minimum  
15 number of genes > 500, maximum number of genes < 7000, maximum mitochondrial reads  
16 fraction < 0.2, maximum Scrublet<sup>57</sup> doublet score ≤ 0.5). Data normalization and log  
17 transformation were performed using *scanpy*<sup>15</sup> (v1.9.1)  
18 (*scanpy.pp.normalize\_per\_cell(counts\_per\_cell\_after=10e4)* and *scanpy.pp.log1p*). Highly  
19 variable genes were then selected (*scanpy.pp.highly\_variable\_genes*), and PCA  
20 (*scanpy.pp.pca*), neighborhood graph (*scanpy.pp.neighbors*) and UMAP (*scanpy.tl.umap*)  
21 were computed. Automatic annotation was done using *celltypist* (v1.2.0)  
22 (*celltypist.annotate(model = 'Immune\_All\_Low.pkl', majority\_voting = True)*).

23 Single-cell αβTCR and BCR sequencing data was mapped with *cellranger vdj* (v6.1.2) and  
24 processed further using *Dandelion* as described above. For all samples, contigs were  
25 extracted from 'all\_contig\_igblast\_db-all.tsv' or in the case whereby 'all\_contig\_igblast\_db-  
26 all.tsv' was empty, 'all\_contig\_igblast\_db-fail.tsv' was used. Only contigs from annotated  
27 cells were kept for downstream analysis.

## 28 **Factors associated with multi-J mapping**

### 29 Logistic regression analysis

30 We used the following logistic regression model to look for factors associated with multi-J  
31 mapping:

$$32 \quad \log \frac{p_i}{1 - p_i} = \beta_{cell,c(i)} + \beta_{J,j(i)} + \beta_V x_{V,i} + \beta_{cyclo} x_{V,i} x_{cyclo,i}$$

33 where  $p_i$  is the probability of multi-J mapping present in the  $i$ th contig,  $c(i)$  and  $j(i)$  are the  
34 cell type and the 5' end J gene of the  $i$ th contig respectively,  $x_{V,i}$  is the indicator of whether V  
35 gene is present in the  $i$ th contig and  $x_{cyclo,i}$  is the indicator of whether  $i$ th contig belongs to a  
36 cell that had cycloheximide treatment. Here, ( $\beta_{cell,c}: c \in cell\ types$ ), ( $\beta_{cell,j}: j \in$   
37 *5' end J genes*),  $\beta_V$  and  $\beta_{cyclo}$  are parameters to be estimated.

38  
39 To control for multiple testing,  $P$ -values were adjusted with Benjamini–Hochberg  
40 procedure<sup>58</sup>. This was applied on all contigs from the γδTCR, αβTCR and BCR sequencing

1 data that were identified within high-quality annotated cells from Suo et al. 2022<sup>3</sup> and results  
2 are shown in **Supplementary Table 2**; and it was also applied on contigs from the  $\alpha\beta$ TCR  
3 and BCR sequencing data that were identified within high-quality annotated cells from  
4 control/cycloheximide-treated PBMCs and results are shown in **Supplementary Table 3**.

#### 5 Splicing site motif analysis

6 For the lists of 5' end J genes that had significant (BH adjusted  $P$ -value  $< 0.05$ ) association  
7 with increased or decreased multi-J mapping from **Supplementary Table 2**, the sequences of  
8 the last 10 nucleotides at each gene's 3' ends with the first 11 nucleotides of its 3' end intron  
9 were extracted from the 10X GRCh38 2020-A reference. Sequence logos shown in **Fig. 2e**  
10 were generated on <https://weblogo.berkeley.edu/logo.cgi><sup>59</sup>.

#### 11 **$\gamma\delta$ TCR annotation comparison**

12  
13 To compare our  $\gamma\delta$ TCR annotations against the 10X *cellranger vdj* output in the 33  $\gamma\delta$ TCR  
14 libraries<sup>3</sup>, we performed two additional mappings following 10X  $\gamma\delta$ TCR support instructions.  
15 In one, the 5.0.0 reference was modified according to 10X instructions by replacing all  
16 instances of TRG with TRA and TRD with TRB. The reference was filtered to just  
17 TRG/TRD sequences prior to this replacement to avoid erroneous sequence overlaps. For the  
18 other, we performed the alignment with *cellranger v7.0.0* with the accompanying reference  
19 (v7.0.0). The output of these two mappings was compared with the *cellranger - Dandelion*  
20 pre-processing pipeline described above. The number of high confidence  $\gamma\delta$ TCR contigs and  
21 high confidence productive  $\gamma\delta$ TCR contigs were determined for each mapping and each  
22 sample, and mappings were compared with the Wilcoxon signed-rank test. The effect size  $r$  is  
23 the rank correlation, which is the signed-rank test statistic divided by the total rank sum<sup>60</sup>.

#### 24 **Differential V(D)J usage in adult T cell subsets**

25  
26 Preprocessed and annotated scRNA-seq data of T and innate lymphoid cells with paired  
27  $\alpha\beta$ TCR information from Conde et al. 2022<sup>5</sup> was downloaded from  
28 <https://www.tissueimmunecellatlas.org/>. Only cells within the T cell subsets with paired  
29  $\alpha\beta$ TCR were included in the downstream analysis. T\_CD4/CD8 was excluded as a low  
30 quality cell cluster. The cells were then pseudo-bulked by donor ID and cell type, and the  
31 pseudo-bulk V(D)J feature space was created with TRAV, TRAJ, TRBV and TRBJ. Only  
32 pseudo-bulks with at least 10 cells were kept. PCA, neighborhood graph and UMAP of the  
33 pseudo-bulk V(D)J feature space were computed using *scanpy*<sup>15</sup> (v1.9.1) with default settings  
34 (*scanpy.pp.pca*, *scanpy.pp.neighbors*, *scanpy.tl.umap*).

35  
36 For low-level cell type annotations, Tem/emra\_CD8, Tnaive/CM\_CD8, Trm/em\_CD8,  
37 Trm\_gut\_CD8 were grouped into CD8+T, and Teffector/EM\_CD4, Tfh, Tnaive/CM\_CD4,  
38 Tnaive/CM\_CD4\_activated, Tregs, Trm\_Th1/Th17 were grouped into CD4+T, while MAIT  
39 was left as a separate annotation. For differential V(D)J usage, Wilcoxon rank-sum test was  
40 performed using *scanpy.tl.rank\_genes\_groups(method='wilcoxon')*.

#### 41 **Pseudotime inference from DP to mature T cells**

42  
43 Data integration and filtering

1 scRNA-seq data of human fetal lymphoid cells from Suo et al. 2022<sup>3</sup> was integrated with  
2 *Dandelion* preprocessed  $\alpha\beta$ TCR, BCR and  $\gamma\delta$ TCR data (see section on **Non-productive**  
3 **TCR/BCR contigs**, using *all\_contig\_igblast\_db-all.tsv* for all samples) with  
4 *dandelion.tl.transfer*. Two samples from F67, F67\_TH\_CD137\_FCAImmP7851896 and  
5 F67\_TH\_MAIT\_FCAImmP7851897 were excluded from the analysis as they were sorted for  
6 specific T cell subpopulations, instead of the CD45 sorting in all other donor samples, and  
7 inclusion might result in biased TCR sampling within this donor. Only DP(P)\_T, DP(Q)\_T,  
8 ABT(ENTRY), CD8+T, CD4+T cells with productive TRA and TRB were included for the  
9 trajectory analysis. Neighborhood graph (*scanpy.pp.neighbors(n\_neighbors = 50)*) and  
10 UMAP (*scanpy.tl.umap*) was re-calculated using scVI latent factors as the initial data was  
11 integrated with *scVI*<sup>61</sup>.

12

### 13 *Pseudotime inference from neighborhood V(D)J feature space*

14 Neighborhoods were sampled using *Milo*<sup>21</sup> (*milo.make\_nhods*). Cells were pseudo-bulked  
15 by the sampled neighborhoods and the V(D)J feature space was created with cells' primary  
16 TRAV, TRAJ, TRBV and TRBJ genes. The cell type annotation of each neighborhood was  
17 assigned to be the most frequent annotation of the cells within that neighborhood. PCA,  
18 neighborhood graph and UMAP of the neighborhood V(D)J feature space were computed  
19 using *scanpy*<sup>15</sup> (v1.9.1) with default settings (*scanpy.pp.pca*, *scanpy.pp.neighbors*,  
20 *scanpy.tl.umap*).

21

22 For pseudotime trajectory analysis, *palantir*<sup>23</sup> was used and diffusion map was computed  
23 using the first five principal components (PCs)  
24 (*palantir.utils.run\_diffusion\_maps(n\_components=5)*,  
25 *palantir.utils.determine\_multiscale\_space*). The root cell was chosen to be the DP(P) T  
26 neighborhood with the smallest value on UMAP1 axis, and the two terminal states were  
27 chosen with the largest and smallest values on the UMAP2 axis for CD4+T and CD8+T  
28 neighborhoods respectively (**Supplementary Fig. 3d**). Pseudotime and branch probabilities  
29 to the terminal states were then computed with  
30 *palantir.core.run\_palantir(num\_waypoints=500)*.

31

32 Imputed pseudotime and branch probabilities were then projected back from neighborhoods  
33 (**Fig. 3c**) to cells (**Fig. 4a** top panel) by averaging the parameters from all neighborhoods a  
34 given cell belongs to, weighted by the inverse of the neighborhood size. Cells that did not  
35 belong to any neighborhood were removed (88 out of 17308).

36

### 37 *Pseudotime inference from neighborhood GEX feature space*

38 Raw gene counts from scRNA-seq data were pseudo-bulked by the same cell neighborhoods  
39 as above. Data normalization and log transformation were performed using *scanpy*<sup>15</sup> (v1.9.1)  
40 (*scanpy.pp.normalize\_per\_cell(counts\_per\_cell\_after=10e4)* and *scanpy.pp.log1p*). Highly  
41 variable genes were then selected (*scanpy.pp.highly\_variable\_genes*), and PCA  
42 (*scanpy.pp.pca*), neighborhood graph (*scanpy.pp.neighbors*) and UMAP (*scanpy.tl.umap*) of  
43 the neighborhood GEX feature space were computed. Pseudotime trajectory inference was  
44 done similar to above with the first five PCs. The root cell was chosen to be the DP(P) T

1 neighborhood with the smallest value on UMAP1 axis, and the two terminal states were  
2 chosen with the largest and smallest values on the UMAP2 axis for CD4+T and CD8+T  
3 neighborhoods respectively (**Supplementary Fig. 4c**). Imputed pseudotime and branch  
4 probabilities were then projected back from neighborhoods (**Supplementary Fig. 4d**) to cells  
5 (**Fig. 4a** bottom right panel).

6

#### 7 Pseudotime inference from single cell GEX

8 Pseudotime trajectory inference was performed with *palantir*<sup>23</sup> using the first 20 scVI latent  
9 factors. The root cell was chosen to be the DP(P) T cell with the largest value on UMAP2  
10 axis, and the two terminal states were chosen with the largest and smallest values on the  
11 UMAP1 axis for CD8+T and CD4+T cells respectively (**Supplementary Fig. 4a**). Results of  
12 the inferred pseudotime and branch probabilities are shown in **Supplementary Fig. 4b**.

13

#### 14 Correlation between pseudotime ordering and relative TRAV/TRAJ locations

15 The relative genomic location of each TRAV gene was encoded numerically based on its  
16 order among all TRAV genes from 5' to 3' on the genome, and similarly for TRAJ. For each  
17 neighborhood, its relative TRAV or TRAJ location was computed by the average relative  
18 locations of all cells within that neighborhood. Only neighborhoods that had more than 90%  
19 cells being DP(Q) T cells were selected. The relative pseudotime order was plotted against  
20 the average relative TRAV or TRAJ location for each neighborhood in **Fig. 4b**. Local  
21 Pearson's correlations were then computed over sliding windows of 30 adjacent  
22 neighborhoods on the pseudotime order (**Supplementary Fig. 5a-b**).

23

#### 24 Correlation between gene expression and branch probabilities to CD8+T in abT(entry) cells

25 Pearson's correlations were computed between gene expression and branch probabilities to  
26 CD8+T lineage within abT(entry) cells for all genes. *P*-values were adjusted for multiple  
27 testing with Benjamini–Hochberg procedure. Results are shown in **Fig. 4c**, **Supplementary**  
28 **Fig. 5d** and **Supplementary Table 6**.

29

#### 30 **VDJ-based dimensionality reduction with Conga**

31 Preprocessed and annotated scRNA-seq data of human fetal lymphoid cells from Suo et al.  
32 2022<sup>3</sup> was downloaded from <https://developmental.cellatlas.io/fetal-immune>. Matching  
33  $\alpha\beta$ TCR samples had their *all\_contig\_annotations.csv cellranger* output files flagged with the  
34 sample IDs for both cell and contig IDs, and were subsequently merged into a single file and  
35 subset to just high confidence contigs for cells present in the scRNA-seq object. This file was  
36 used on input for Conga's *setup\_10x\_for\_conga.py* script, which produced a tcrdist-based  
37 PCA representation of the cells' VDJ data. The PCA coordinates were used to compute a  
38 neighborhood graph and UMAP representation (**Supplementary Fig. 3f**), using default  
39 *scanpy* settings.

40

#### 41 **Pseudotime inference combining ILC/NK and T cells**

##### 42 Pseudotime inference using TRBJ

43 scRNA-seq data of human fetal lymphoid cells from Suo et al. 2022<sup>3</sup> was integrated with  
44  $\alpha\beta$ TCR data as described above. Only DN(early)\_T, DN(P)\_T, DN(Q)\_T, DP(P)\_T,

1 DP(Q)\_T, ILC2, ILC3, CYCLING\_ILC, NK, CYCLING\_NK cells with TRBJ were included  
2 for the trajectory analysis. Neighborhood graph (k=50) and UMAP was re-calculated using  
3 scVI latent factors similar to above.

4

5 For pseudotime trajectory analysis, *palantir*<sup>23</sup> was used and a diffusion map was computed  
6 using the first five PCs. The root cell was chosen to be the neighborhood with the highest  
7 CD34 expression, and the two terminal states were chosen with the largest and smallest  
8 values on the UMAP1 axis for T and NK/ILC cell neighborhoods respectively

9 **(Supplementary Fig. 8a)**. Pseudotime and branch probabilities to the terminal states were  
10 then computed and projected back from neighborhoods (**Fig. 5b**) to cells (**Fig. 5c** top panel).

11

#### 12 Gene expression trend in DN T cells along pseudotime

13 Chatterjee's correlations<sup>52</sup> were computed between gene expression and inferred pseudotime  
14 within DN T cells for all genes that were expressed in at least 10 cells. Chatterjee's  
15 correlation was chosen instead of Pearson's or Spearman's correlation to look for any  
16 functional change and not restricted to a monotonic change. TFs<sup>62</sup> and genes encoding cell  
17 surface proteins that had significantly high Chatterjee's correlation with pseudotime (BH  
18 adjusted P-value < 0.05, and correlation coefficient > 0.1) were shown in **Fig. 5c** and  
19 **Supplementary Fig. 8b** respectively.

## 1 **Code and data availability**

2 *Dandelion* is implemented as an open-source package in Python 3  
3 (<https://github.com/zktuong/dandelion>) with tutorials available at [https://sc-](https://sc-dandelion.readthedocs.io/en/latest/)  
4 [dandelion.readthedocs.io/en/latest/](https://sc-dandelion.readthedocs.io/en/latest/). The tool and workflow is also available through an  
5 interactive online Google Colab notebook at  
6 [https://colab.research.google.com/github/zktuong/dandelion/blob/master/container/dandelion](https://colab.research.google.com/github/zktuong/dandelion/blob/master/container/dandelion_singularity.ipynb)  
7 [\\_singularity.ipynb](https://colab.research.google.com/github/zktuong/dandelion/blob/master/container/dandelion_singularity.ipynb). Code and data used to generate figures and perform analyses in the  
8 manuscript are available at [https://github.com/zktuong/dandelion-demo-](https://github.com/zktuong/dandelion-demo-files/dandelion_manuscript)  
9 [files/dandelion\\_manuscript](https://github.com/zktuong/dandelion-demo-files/dandelion_manuscript).

10

## 11 **Acknowledgements**

12 We acknowledge the Cellular Genetics IT, New Pipeline Group and DNA pipelines of Sanger  
13 Institute. K.B.M. and S.A.T. are supported by Wellcome (WT211276/Z/18/Z,  
14 108413/A/15/D and Sanger core grant WT206194). K.B.M. acknowledges funding from the  
15 MRC (MR/S035907/1). M.H. is supported by Wellcome (grant WT107931/Z/15/Z), the  
16 Lister Institute for Preventive Medicine, NIHR, and the Newcastle Biomedical Research  
17 Centre. S.A.T. is supported by an ERC Consolidator Grant ThDEFINE (646794). C.S. is  
18 supported by a Wellcome Trust Ph.D. Fellowship for Clinicians. Z.K.T. and M.R.C. are  
19 supported by a Medical Research Council Research Project Grant (MR/S035842/1). M.R.C.  
20 is supported by the National Institute of Health Research (NIHR) Research Professorship  
21 (RP-2017-08-ST2-002), a Wellcome Investigator Award (220268/Z/20/Z), the Blood and  
22 Transplant Research Unit in Organ Donation and the NIHR Cambridge Biomedical Research  
23 Centre.

## 24 **Author contributions**

25 C.S., Z.K.T., M.R.C. and S.A.T. conceived the initial project. C.S. and Z.K.T. set up and  
26 directed the study. C.S., K.P., E.D. and Z.K.T. performed bioinformatic analyses. C.S., K.P.  
27 and Z.K.T. developed the software. C.S. and R.V.B. performed cell culture experiments. E.D.,  
28 R.G.H.L., R.V.B., R.V., M.H., K.B.M., M.R.C., and S.A.T. provided intellectual input.  
29 M.R.C. and S.A.T. acquired funding. C.S., K.P. and Z.K.T. wrote the manuscript. All authors  
30 read and/or edited the manuscript.

31

## 32 **Competing interests**

33 In the past three years, S.A.T. has received remuneration for Scientific Advisory Board  
34 Membership from Sanofi, GlaxoSmithKline, Foresite Labs and Qiagen. S.A.T. is a co-  
35 founder and holds equity in Transition Bio. Z.K.T. has received consulting fees from Synteny  
36 Biotechnologies Ltd on activities unrelated to this manuscript.

37
